1 **FRMD8 promotes inflammatory and growth factor signalling by stabilising the**  
2 **iRhom/ADAM17 sheddase complex**

3

4 Ulrike Künzel, Adam G. Grieve, Yao Meng<sup>2</sup>, Sally A. Cowley, Matthew Freeman\*

5

6 Sir William Dunn School of Pathology

7 University of Oxford

8 South Parks Road

9 Oxford OX1 3RE

10

11 <sup>2</sup>Current address:

12 Department of Biochemistry

13 University of Oxford

14 South Parks Road

15 Oxford OX1 3QU

16

17 \*Correspondence to Lead Contact: [matthew.freeman@path.ox.ac.uk](mailto:matthew.freeman@path.ox.ac.uk)

## 18 **Abstract**

19 Many intercellular signals are synthesised as transmembrane precursors that are released  
20 by proteolytic cleavage ('shedding') from the cell surface. ADAM17, a membrane-tethered  
21 metalloprotease, is the primary shedding enzyme responsible for the release of the  
22 inflammatory cytokine TNF $\alpha$  and several EGF receptor ligands. ADAM17 exists in complex  
23 with the rhomboid-like iRhom proteins, which act as cofactors that regulate ADAM17  
24 substrate shedding. Here we report that the poorly characterised FERM domain-containing  
25 protein FRMD8 is a new component of iRhom2/ADAM17 sheddase complex. FRMD8 binds  
26 to the cytoplasmic N-terminus of iRhoms, and is necessary to stabilise the iRhoms and  
27 ADAM17 beyond the Golgi. In the absence of FRMD8, iRhom2 and ADAM17 are degraded  
28 via the endolysosomal pathway, resulting in the reduction of ADAM17-mediated shedding.  
29 We have confirmed the pathophysiological significance of FRMD8 in iPSC-derived human  
30 macrophages and mouse tissues, thus demonstrating its role in the regulated release of  
31 multiple cytokine and growth factor signals.

32

## 33 **Introduction**

34 The cell surface protease ADAM17 (also called TACE) mediates the release of many  
35 important signalling molecules by 'shedding' their extracellular ligand domains from  
36 transmembrane precursors. A prominent example is ADAM17's role in releasing the tumour  
37 necrosis factor alpha (TNF $\alpha$ ) (Black et al., 1997, Moss et al., 1997), a primary cytokine  
38 involved in the inflammatory responses to infection and tissue damage (Kallioli and  
39 Ivashkiv, 2016). In addition, ADAM17 is the principle sheddase of the epidermal growth  
40 factor (EGF) receptor ligands amphiregulin (AREG), transforming growth factor alpha  
41 (TGF $\alpha$ ), heparin-binding EGF (HB-EGF), epigen, and epiregulin (Sahin et al., 2004, Sahin  
42 and Blobel, 2007). The control of ADAM17 activity has therefore been the focus of much  
43 fundamental and pharmaceutical research (reviewed in (Rose-John, 2013, Zunke and Rose-  
44 John, 2017)). We and others have previously reported that the rhomboid-like iRhom proteins  
45 have a specific and extensive regulatory relationship with ADAM17, to the extent that iRhoms  
46 can effectively be considered as regulatory subunits of the protease. iRhoms are members of  
47 a wider family of evolutionarily related multi-pass membrane proteins, called the rhomboid-  
48 like superfamily (Freeman, 2014). The family is named after the rhomboids, intramembrane  
49 serine proteases that cleave substrate transmembrane domains (TMDs), but many  
50 members, including iRhoms, have lost protease activity during evolution.

51 iRhom1 and its paralogue iRhom2 (encoded by the genes *RHBDF1* and *RHBDF2*)  
52 show redundancy in regulating ADAM17 maturation, but differ in their tissue expression  
53 (Christova et al., 2013). Many cell types express both iRhoms, so the loss of one can be  
54 compensated by the other (Christova et al., 2013, Li et al., 2015). Macrophages are,  
55 however, an exception: iRhom1 is not expressed, so iRhom2 alone regulates ADAM17, and  
56 therefore TNF $\alpha$  inflammatory signalling in macrophages (Adrain et al., 2012, McIlwain et al.,  
57 2012, Issuree et al., 2013). iRhoms control ADAM17 activity in multiple ways. First, they bind  
58 to the catalytically immature pro-form of ADAM17 (proADAM17) in the endoplasmic reticulum  
59 (ER), and are required for its trafficking from the ER to the Golgi apparatus (Adrain et al.,  
60 2012, McIlwain et al., 2012). Once proADAM17 reaches the Golgi, it is matured by the  
61 removal of its inhibitory pro-domain by pro-protein convertases (Schlondorff et al., 2000,  
62 Endres et al., 2003) and is further trafficked to the plasma membrane. iRhoms have further  
63 regulatory functions beyond this step of ADAM17 maturation. Still bound to each other,  
64 iRhom2 prevents the lysosomal degradation of ADAM17 (Grieve et al., 2017). Later, iRhom2  
65 controls the activation of ADAM17: phosphorylation of the iRhom2 cytoplasmic tail promotes  
66 the recruitment of 14-3-3 proteins, which promote shedding activity of ADAM17, thereby  
67 releasing TNF $\alpha$  from the cell surface in response to inflammatory triggers (Grieve et al.,  
68 2017, Cavadas et al., 2017). Finally, iRhoms are also reported to contribute to ADAM17  
69 substrate specificity (Maretzky et al., 2013). This intimate regulatory role of iRhoms make  
70 them essential players in ADAM17-mediated signalling and thus new targets for manipulating  
71 inflammatory signalling. The significance of this potential is underlined by the fact that anti-  
72 TNF $\alpha$  therapies, used to treat rheumatoid arthritis and other inflammatory diseases, are  
73 currently the biggest grossing drugs in the world (Monaco et al., 2015).

74 Despite the role of the iRhom/ADAM17 shedding complex in controlling signalling,  
75 much is yet to be understood about the molecular mechanisms that control this inflammatory  
76 trigger. To identify the wider machinery by which iRhoms regulate ADAM17, we report here a  
77 proteomic screen to identify their binding partners. We have identified the poorly  
78 characterised FERM domain-containing protein 8 (FRMD8) as having a strong and specific  
79 interaction with the cytoplasmic region of iRhoms. The functional significance of this  
80 interaction is demonstrated by loss of FRMD8 causing a similar phenotype to iRhom  
81 deficiency in cells: loss of mature ADAM17 and severely reduced shedding of ADAM17  
82 substrates from the cell surface. We show that loss of FRMD8 leads to lysosomal  
83 degradation of mature ADAM17 and iRhom2, indicating that although FRMD8 binds to  
84 iRhom2 throughout its entire life cycle, its main function is to stabilise iRhoms and ADAM17  
85 once they reach the plasma membrane. Overall, our results imply that FRMD8 is an essential  
86 component of the inflammatory signalling machinery. To test this proposal *in vivo* we deleted  
87 the FRMD8 gene in human induced pluripotent stem cells (iPSCs) and differentiated them

88 into macrophages. Consistent with our biochemical data, these mutant macrophages were  
89 defective in their ability to release TNF $\alpha$  in response to lipopolysaccharide (LPS) stimulation,  
90 demonstrating the pathophysiological importance of FRMD8 in the normal inflammatory  
91 response by human macrophages. The *in vivo* significance of FRMD8 in regulating the  
92 stability of the iRhom/ADAM17 shedding complex was further reinforced by our observation  
93 that mature ADAM17 and iRhom2 protein levels are strongly reduced in tissues of FRMD8-  
94 deficient mice.

95

## 96 **Results**

### 97 **FRMD8 is a novel interaction partner of iRhom1 and iRhom2**

98 To investigate the molecular mechanisms that underlie iRhom2 functions, we performed a  
99 mass spectrometry-based screen to identify new proteins that interact with human iRhom2.  
100 C-terminally tagged protein (iRhom2-3xHA) was stably expressed in human embryonic  
101 kidney (HEK) 293T cells and immunoprecipitated. The bead eluates containing  
102 immunoprecipitated iRhom2 and its interacting proteins were analysed by label-free mass  
103 spectrometry. As a negative control, we did the same analysis in parallel with 3xHA-tagged  
104 UNC93B1, an unrelated polytopic protein that, like iRhom2, is predominantly located in the  
105 ER (Koehn et al., 2007) (Fig. S1A). Quantitative protein abundance data from three biological  
106 replicates of Rhom2 and UNC93B1 co-immunoprecipitations were statistically analysed  
107 using the Perseus software platform (Tyanova et al., 2016). Validating the overall approach,  
108 we detected ADAM17, the known iRhom2 interacting protein (Adrain et al., 2012, McIlwain et  
109 al., 2012, Christova et al., 2013) as a statistically significant hit (Fig. 1A, S1B). Among other  
110 significant hits were several 14-3-3 proteins ( $\eta$ ,  $\epsilon$ ,  $\gamma$ ,  $\sigma$ ,  $\theta$ ,  $\zeta/\delta$ )  
111 and MAPK1/3 (Fig. S1B), which we have previously reported to participate in the regulation  
112 of inflammatory signalling by phosphorylation of iRhom2 (Grieve et al., 2017). The top hit by  
113 a long way, however, was FRMD8 (Fig. 1A, S1B), a poorly studied protein that has not  
114 previously been implicated in iRhom function, ADAM17 regulation, or growth factor or  
115 cytokine signalling.

116 We confirmed the interaction between iRhom2 and FRMD8 by immunoprecipitation. C-  
117 terminally V5 tagged FRMD8 co-immunoprecipitated with either iRhom1-3xHA or iRhom2-  
118 3xHA (Fig. 1B). Conversely, we pulled down both iRhom1-3xHA and iRhom2-3xHA with an  
119 antibody against the V5 tag. Finally, we were also able to co-immunoprecipitate endogenous  
120 FRMD8 with iRhom2-3xHA (Fig. S1C). Together these results identify FRMD8 as a bona fide  
121 binding partner of iRhom1 and iRhom2 in human cells.

## 122 **FRMD8 is required for iRhom function**

123 As its name indicates, FRMD8 is a FERM (4.1/ezrin/radixin/moesin) domain-  
124 containing protein. It is predicted to be a soluble cytoplasmic protein, and the only report  
125 about its function describes it as binding to the Wnt accessory receptor low-density  
126 lipoprotein receptor-related protein 6 (LRP6), and negatively regulating Wnt signalling  
127 (Kategaya et al., 2009). To investigate the functional significance of FRMD8 binding to  
128 iRhoms, we examined the effects of loss of FRMD8 on iRhom function in HEK293T cells,  
129 using both siRNA and CRISPR/Cas9-mediated gene deletion (Fig. 2A, B). In both cases,  
130 loss of FRMD8 drastically reduced the protein levels of mature ADAM17 (Fig. 2A, B). This  
131 effect was specific to ADAM17, as the maturation of its closest homologue, ADAM10, was  
132 unaffected by loss of FRMD8 (Fig. 2B). Moreover, mature ADAM17 levels were rescued by  
133 expression of FRMD8-V5 in FRMD8 knockout HEK293T cells (Fig. 2C), confirming that the  
134 phenotype was caused by FRMD8 loss. Finally, in addition to this reduction of mature  
135 ADAM17 caused by FRMD8 loss, we found a striking loss of ADAM17, but not ADAM10, on  
136 the cell surface (Fig. 2D). These phenotypes partially phenocopy the loss of iRhoms  
137 (Christova et al., 2013, Grieve et al., 2017), consistent with FRMD8 being needed for iRhoms  
138 to act as positive regulators of ADAM17.

139 We also examined the consequences of loss of FRMD8 on ADAM17-dependent  
140 signalling. The shedding of alkaline phosphatase (AP)-tagged EGF receptor ligands AREG  
141 and HB-EGF, after stimulation with phorbol 12-myristate 13-acetate (PMA), were both  
142 substantially reduced in FRMD8 knockout cells (Fig. 2E). To exclude the possibility that the  
143 defect in FRMD8 knockout cells is an inability to respond to PMA, we measured both PMA-  
144 stimulated and unstimulated, constitutive shedding of AP-tagged TGF $\alpha$ , another major EGFR  
145 ligand. Again, FRMD8 knockout cells released significantly less AP-TGF $\alpha$  compared to wild-  
146 type cells, both after stimulation but also after 20 h of constitutive shedding (Fig. 2F),  
147 implying that mutant cells had fundamental defects in their ability to shed ADAM17 ligands,  
148 regardless of PMA stimulation. To demonstrate that the release of ligands was indeed  
149 caused by metalloprotease shedding and not simply an indication of leakage caused by cell  
150 death, we showed that it was sensitive to the ADAM10/17 inhibitor GW280264X (GW)  
151 (Fig. 2E, F). Overall, as with ADAM17 maturation and localisation, the shedding defects in  
152 FRMD8-deficient cells resemble those caused by the loss of iRhoms.

## 153 **FRMD8 binds to the iRhom2 cytoplasmic N-terminus throughout the entire secretory** 154 **pathway**

155 As described above, iRhoms regulate ADAM17 function at multiple stages: from ER-to-  
156 Golgi trafficking, to the activation of the sheddase at the cell surface. To address where

157 FRMD8 fits in this long-term relationship between iRhoms and ADAM17, we started by  
158 analysing where in the secretory pathway FRMD8 binds to iRhom2. Immunofluorescent  
159 staining of FRMD8-V5 with anti-V5 antibody confirmed what had been reported by Kategaya  
160 et al.(2009): the protein is detected in the cytoplasm and associated with the plasma  
161 membrane (Fig. 3A). When co-expressed with iRhom2-3xHA, we detected significant co-  
162 localisation between the proteins (Fig. 3A) further confirming the interaction of FRMD8 and  
163 iRhom2. Taking a more biochemical approach, immunoprecipitation of FRMD8 pulled down  
164 both immature and mature ADAM17 (Fig. 2B), indicating that there is a sufficiently stable  
165 tripartite complex between FRMD8, iRhom2 and ADAM17 to allow FRMD8 to co-  
166 immunoprecipitate ADAM17. Note that FRMD8 did not pull down ADAM17 in cells mutant for  
167 both iRhoms (Fig. S2A), implying that there is no direct link between them; instead both can  
168 bind simultaneously to iRhom2. Significantly, FRMD8 binds iRhom2 when in complex with  
169 immature ADAM17, which only exists in the ER and early Golgi apparatus, and also iRhom2  
170 in complex with mature ADAM17, which exists in the *trans*-Golgi network and beyond;  
171 together these data imply that FRMD8 binds to iRhom2 throughout the secretory pathway.

172 As a cytoplasmic protein, FRMD8 was likely to bind to the only substantial cytoplasmic  
173 region of iRhom2, its N-terminus. We therefore made a set of iRhom2-3xHA N-terminal  
174 deletion constructs (Fig. 2C) to locate the binding site. Deletion of the first 200 amino acids in  
175 the N-terminus of iRhom2 did not disrupt FRMD8 binding, but no interaction was detected in  
176 mutants greater than  $\Delta$ 300 (Fig. 2D), implying that the region between 200 and 300 amino  
177 acids was necessary for FRMD8 binding. Although the N-terminal cytoplasmic tail of iRhom2  
178 contains multiple regulatory phosphorylation sites (Fig. S2B), the FRMD8 binding region  
179 does not overlap with the sites required for phosphorylation-dependent 14-3-3 binding  
180 (Grieve et al., 2017, Cavadas et al., 2017). Consistent with this, the interaction of FRMD8  
181 with iRhom2 was not changed upon PMA stimulation (Fig. 2E). Moreover, an iRhom2  
182 mutant, in which 15 conserved phosphorylation sites have been mutated to alanine  
183 (iRhom2<sup>pDEAD</sup>, Fig. S2C) (Grieve et al., 2017), did not abolish the interaction to FRMD8 (Fig.  
184 2E), further demonstrating that the binding of FRMD8 to iRhom2 is independent of the  
185 phosphorylation state of iRhom2.

186 Interestingly, the FRMD8 binding site is absent in a mouse iRhom2 mutant called *curly-*  
187 *bare* (*cub*), which lacks residues 1-268 (Hosur et al., 2014, Siggs et al., 2014). Sequence  
188 alignment shows that the deletion of 268 amino acids in mouse iRhom2 corresponds to the  
189 loss of residues 1-298 in the human protein (Fig. 2C, S2B). Consistent with this mapping  
190 data, we found that whereas full-length mouse iRhom2 bound human FRMD8, the *cub*  
191 mutant form cannot (Fig. 3E). This failure of FRMD8 binding presumably contributes to the

192 complex defects that underlie the *cub* phenotype (Johnson et al., 2003, Hosur et al., 2014,  
193 Siggs et al., 2014).

#### 194 **FRMD8 protects iRhom2 and ADAM17 from lysosomal degradation**

195 These experiments demonstrate that FRMD8 binds to the cytoplasmic N-terminal  
196 region of iRhom2, which has previously been shown to be required to stabilise ADAM17 at  
197 the cell surface (Grieve et al., 2017). We therefore tested whether FRMD8 is necessary for  
198 iRhom2 to stabilise ADAM17. Treatment of HEK293T wild-type and FRMD8 knockout cells  
199 with the lysosomal degradation inhibitors bafilomycin and ammonium chloride restored the  
200 mature form of ADAM17 (Fig. 4A; S3A). This result explains the reduced level of mature  
201 ADAM17 in FRMD8 knockout cells: it implies that the defect caused by loss of FRMD8 is not  
202 a failure of ADAM17 maturation, but instead a failure to stabilise the mature form. In line with  
203 this interpretation, the proteasomal inhibitor MG132 had no effect on the stability of mature  
204 ADAM17 (Fig. 4A). We conclude that FRMD8 binding to iRhom2 acts to promote ADAM17  
205 function by ensuring its stability after its maturation in the *trans*-Golgi network.

206 These data led us to test the hypothesis that FRMD8 might act as a stabilising factor  
207 for the plasma membrane-localised iRhom/ADAM17 sheddase complex that controls the  
208 release of growth factors and cytokines. When assaying total levels of exogenously  
209 expressed iRhom2, we did not detect any difference between wild-type and FRMD8-deficient  
210 cells (Fig. S1C). However, consistent with previous reports (Maney et al., 2015, Grieve et al.,  
211 2017), under these experimental conditions most iRhom2 is ER-localised (Fig. S1A) and the  
212 cell surface fraction is relatively small. We therefore used cell surface immunostaining of  
213 iRhom2 followed by flow cytometry to measure specifically the pool of iRhom2 at the cell  
214 surface. In this case the result was clear: in the absence of FRMD8 there was a significant  
215 loss of cell surface iRhom2 (Fig. 4B), although the reduction of total iRhom2 levels was not  
216 detectable (Fig. 4C). Consistent with our conclusion that although FRMD8 binds continuously  
217 to iRhom2, but primarily functions late in the iRhom2/ADAM17 relationship, we detected no  
218 defects in the ER iRhom2/immature ADAM17 interaction in FRMD8 knockout cells (Fig.  
219 S3B), nor in the trafficking of iRhom2 from the ER to the Golgi (Fig. S3C).

220 These results show that by binding to iRhom2, FRMD8 stabilises both iRhom2 and  
221 mature ADAM17, protecting them from degradation. A more direct demonstration of this  
222 stabilising function is provided by overexpressing FRMD8, which leads to increased levels of  
223 exogenously expressed iRhom2 (Fig. 4D), as well as iRhom1 (Fig. S3D). Note that the 50 kD  
224 N-terminally truncated fragment of iRhoms detected in western blots (Nakagawa et al., 2005,  
225 Adrain et al., 2012, Maney et al., 2015) is not stabilised by FRMD8 expression (Fig. 4D,  
226 S3D). This iRhom fragment lacks the cytoplasmic tail, and therefore the binding site for

227 FRMD8, so its insensitivity to FRMD8 is consistent with our model. Intriguingly, the  
228 stabilisation of iRhom2 and FRMD8 is mutual: overexpression of iRhom2 consistently led to  
229 the stabilisation of endogenous FRMD8 protein (Fig. 4E), without affecting FRMD8 mRNA  
230 levels (Fig. 4F). This indicates that the iRhom2-FRMD8 interaction leads to mutual  
231 stabilisation of both proteins.

232 To ensure that our conclusion that FRMD8 stabilises iRhoms was not distorted by our  
233 use of overexpressed proteins, and in the absence of a usable antibody against human  
234 iRhom2, we used CRISPR/Cas9 to insert a triple HA tag into the *RHBDF2* locus to express  
235 endogenously C-terminally tagged iRhom2. siRNA-mediated knockdown of iRhom2  
236 confirmed that this editing was successful (Fig. 5A). The cells showed no defect in ADAM17  
237 maturation (Fig. 5A, S3E), indicating that the tagged protein was functional. In these cells  
238 FRMD8 overexpression led to an increase in endogenous iRhom2 levels (Fig. 5A);  
239 conversely, siRNA knockdown of FRMD8 caused a reduction of iRhom2 protein (Fig. 5B),  
240 but no change of iRhom2 mRNA levels (Fig. 5C). Again, the 50 kDa iRhom2 fragment was  
241 not affected by FRMD8 levels (Fig. 5A, B). Parenthetically, this is the first reported evidence  
242 for the existence of this iRhom fragment endogenously, although its functional significance  
243 remains unclear.

244 To summarise our results to this point, we have discovered that by binding to the  
245 iRhom2 cytoplasmic N-terminus, FRMD8 is necessary to stabilise the cell surface  
246 iRhom2/ADAM17 shedding complex. In the absence of FRMD8, this enzyme complex is  
247 degraded by the lysosome. FRMD8 is therefore an essential component of the sheddase  
248 complex that releases ADAM17 substrates including cytokines and growth factors.

## 249 **FRMD8 binding to iRhom2 is essential for inflammatory signalling in human** 250 **macrophages**

251 We tested the pathophysiological significance of our conclusions by analysing the  
252 consequence of loss of FRMD8 in human macrophages, which release TNF $\alpha$  in response to  
253 tissue damage and inflammatory stimuli. To generate mutant human macrophages, we used  
254 CRISPR/Cas9 to knock out FRMD8 in an iPSC line that had previously been generated from  
255 dermal fibroblasts of a healthy female donor (Fernandes et al., 2016). The FRMD8 knockout  
256 and control iPSCs were analysed for deletions in the *FRMD8* gene by PCR (Fig. S4A), and a  
257 normal karyotype was confirmed by single nucleotide polymorphism (SNP) analysis (Fig.  
258 S4B) before their differentiation into macrophages (Fig. 6A). These mutant macrophages  
259 expressed no detectable FRMD8 and, as in the HEK293T cells, showed severely reduced  
260 levels of mature ADAM17 (Fig. 6B). When challenged with the inflammatory trigger LPS,  
261 TNF $\alpha$  shedding from the cells, as measured by ELISA, was reduced (Fig. 6C). Confirming



262 the expected specificity, the ADAM10 inhibitor GI254023X (GI) had no effect on TNF $\alpha$   
263 release from these cells, whereas GW, an inhibitor of both ADAM10 and ADAM17, further  
264 reduced TNF $\alpha$  release (Fig. 6C). Although shedding was inhibited, induction of TNF $\alpha$   
265 expression by LPS was normal in these cells (Fig. S4C). These results demonstrate that our  
266 conclusions about the requirement for FRMD8 in ADAM17 function in cell culture models  
267 does indeed apply to human macrophages.

## 268 **Loss of FRMD8 in mice highlights its physiological role in stabilising the** 269 **iRhom/ADAM17 complex**

270 To investigate further the physiological significance of our discovery of the role of FRMD8 in  
271 stabilising iRhom/ADAM17 sheddase complexes, we analysed the levels of ADAM17 and  
272 iRhom2 in tissues from FRMD8-deficient mice. These mice were generated from embryonic  
273 stem (ES) cells from the KOMP Repository, University of California Davis, in which all coding  
274 exons (2-11) of the *Frmd8* gene were deleted (Fig. S5A). *Frmd8*<sup>-/-</sup> mice are viable (Fig. S5B)  
275 and the knockout was confirmed by western blot (Fig. S5C). Western blot analysis of tissues  
276 *Frmd8*<sup>-/-</sup> mice showed that mature ADAM17 levels were reduced in all tissues examined  
277 compared to tissues from a wild-type littermates (Fig. 6D). This confirms that FRMD8  
278 controls the level of mature ADAM17 *in vivo*. Of note, there was a major reduction of mature  
279 ADAM17 levels in the brain, a tissue in which iRhom2 is almost completely absent but  
280 iRhom1 levels are high (Christova et al., 2013, Li et al., 2015). This supports our hypothesis  
281 that FRMD8 regulates mature ADAM17 levels through iRhom1 as well as iRhom2. We also  
282 tested *in vivo* our conclusion that FRMD8 loss destabilises endogenous iRhoms (Fig. 5B).  
283 Using an antibody that we had previously generated against mouse iRhom2 (Adrain et al.,  
284 2012), we analysed iRhom2 levels in *Frmd8*<sup>+/+</sup> and *Frmd8*<sup>-/-</sup> mouse tissues. In lung and skin,  
285 both tissues with high iRhom2 expression (Christova et al., 2013), we detected a strong  
286 decrease of iRhom2 protein levels in *Frmd8*<sup>-/-</sup> compared to wild-type (Fig. 6E). Tissue from  
287 *Rhbf2*<sup>-/-</sup> mice served as a control for the iRhom2 antibody specificity (Fig. 6E). In summary,  
288 our experiments in mice confirm the physiological importance of our prior conclusions:  
289 FRMD8 is required *in vivo* to regulate the stability of the iRhom/ADAM17 shedding complex,  
290 and is therefore a previously unrecognised essential component in regulating cytokine and  
291 growth factor signalling.

292

## 293 **Discussion**

294 ADAM17 is the shedding enzyme that is responsible for not only the activation of  
295 inflammatory TNF $\alpha$  signalling, but also the release from the cell surface of multiple EGF

296 family growth factors, and other proteins. Its regulation has therefore received much  
297 attention, both from the perspective of fundamental cell biology and because of the proven  
298 therapeutic significance of blocking TNF $\alpha$  (Monaco et al., 2015). Here we report that FRMD8  
299 is a new component of the regulatory machinery that controls the release of ADAM17  
300 substrates, including TNF $\alpha$ . We identified FRMD8 as a prominent binding partner of iRhoms,  
301 which are rhomboid-like proteins that act as regulatory cofactors of ADAM17. Our  
302 subsequent experiments demonstrate that although FRMD8 binds to iRhoms throughout  
303 their life cycle, its function appears to be confined to the later stages of their role in regulating  
304 ADAM17. FRMD8 stabilises the iRhom2/ADAM17 complex at the cell surface, ensuring it is  
305 available to shed TNF $\alpha$  and growth factors. We took advantage of iPSC technology to  
306 generate human FRMD8 knockout macrophages, allowing us to confirm that the mechanistic  
307 conclusions derived mostly from HEK293T cell models were indeed relevant to the human  
308 cells that provide the primary inflammatory response. Finally, tissues from FRMD8 knockout  
309 mice demonstrate the physiological importance of FRMD8 in a whole organism, and confirm  
310 that it stabilises the iRhom/mature ADAM17 complex *in vivo*.

311 Bringing together all our results, we propose the following model of FRMD8 function in  
312 ADAM17-dependent signalling: FRMD8 binds to the cytoplasmic domain of iRhoms  
313 throughout the secretory pathway, forming a tripartite complex when iRhoms are also bound  
314 to ADAM17. Despite this long-term relationship, we have found no evidence for a functional  
315 role for FRMD8 in ER-to-Golgi trafficking or ADAM17 maturation. Instead, FRMD8 acts later,  
316 to prevent the endolysosomal degradation of the iRhom/ADAM17 complex (Fig. 7). As we  
317 have previously reported, it is this complex that is responsible for shedding ADAM17  
318 substrates including, notably, TNF $\alpha$ . Without FRMD8, iRhoms and mature ADAM17 are  
319 destabilised and the cell cannot shed TNF $\alpha$  in response to an inflammatory challenge.  
320 Combined with our previous studies (Grieve et al. 2017), this work has changed our  
321 perspective on ADAM17, the central enzyme in cytokine and growth factor shedding. Our  
322 evidence implies that it would be more appropriate to consider it as the active subunit of a  
323 regulatory complex at the cell surface, where iRhoms provide regulatory functions (Maney et  
324 al., 2015, Cavadas et al., 2017, Grieve et al., 2017), and FRMD8 maintains the stability of the  
325 iRhom/ADAM17 complex post-ADAM17 maturation. It is essential that a pool of the  
326 sheddase is available on the cell surface to execute, for example, rapid cytokine release in  
327 response to inflammatory signals induced by bacterial infection.

328 In the only other paper about FRMD8 function, it was reported that FRMD8 (named  
329 Bili, after the *Drosophila* mutation) negatively regulates Wnt signalling by binding to the LRP6  
330 co-receptor, thereby preventing the recruitment of the signal transduction protein axin  
331 (KATEGAYA et al., 2009). Although the signalling event being regulated is different, there is the

332 obvious parallel that in both cases FRMD8 binds to the cytoplasmic tail of a transmembrane  
333 protein. In the case of Wnt signalling, this prevents the recruitment of axin; in the case of  
334 iRhom function, we do not yet know what the next step in the molecular chain of events is,  
335 but the cellular consequence is to prevent recruitment of iRhoms into the endolysosomal  
336 degradation system.

337 Our results extend an important theme to emerge from a number of studies, namely  
338 the significance of the cytoplasmic N-terminal region in regulating iRhom function. Several  
339 reports indicate that N-terminal mutations cause complex phenotypes that combine aspects  
340 of gain and loss of iRhom function, which is consistent with a regulatory function for this  
341 region. First, the *cub* mutation, an N-terminal deletion in mouse iRhom2, does not abolish  
342 protein function but instead modulates it in complex ways that are still poorly understood. *cub*  
343 was described as a gain-of-function mutation that leads to constitutively elevated release of  
344 amphiregulin, but is also reported to be defective in releasing TNF $\alpha$  (Hosur et al., 2014).  
345 Second, specific point mutations in the N-terminus of human iRhom2 are the cause of a rare  
346 genetic disorder called tylosis with oesophageal cancer (TOC) (Blaydon et al., 2012,  
347 Saarinen et al., 2012). TOC mutations, as well as truncation of parts of the N-terminus have  
348 been reported to enhance the activity of ADAM17 (Maney et al., 2015), leading to the  
349 conclusion that parts of the N-terminus have inhibitory functions on ADAM17 function. Third,  
350 phosphorylation of specific sites in the iRhom2 N-terminus result in 14-3-3 binding and  
351 consequent activation of substrate shedding by associated ADAM17 (Grieve et al., 2017,  
352 Cavadas et al., 2017), demonstrating that the N-terminus of iRhom2 also positively regulates  
353 ADAM17. Consistent with our current results, we reported previously that iRhom2 lacking the  
354 entire N-terminus is not sufficient to support ADAM17-mediated shedding in iRhom1/2-  
355 deficient cells, although it can promote ER-to-Golgi trafficking of ADAM17 (Grieve et al.,  
356 2017). Complementary to the conclusion that iRhom N-termini are regulatory, the core TMD  
357 binding function of iRhoms depends on their membrane-embedded region (Freeman, 2014).  
358 A picture therefore begins to emerge of iRhoms having a modular structure, with a core,  
359 highly conserved TMD recognition domain in the membrane (and perhaps the lumen),  
360 regulated by a more variable N-terminal domain that can integrate cytoplasmic signals.

361 In light of the growing value of therapeutics that block TNF $\alpha$  signalling, and the wider  
362 potential of modulating a wide range of ADAM17 substrates, it is tempting to speculate that  
363 the cytoplasmic N-termini of iRhoms could provide potential new drug target opportunities.  
364 For example, the limited expression of iRhom2 makes it a theoretically attractive anti-  
365 inflammatory target (Issuree et al., 2013, Lichtenthaler, 2013). iRhom2 knockout mice are  
366 broadly healthy, beyond defects in TNF $\alpha$  and type I interferon signalling that are only  
367 apparent upon challenge by bacterial and viral infections (McIlwain et al., 2012, Luo et al.,

368 2016). Our work now implies that the interface between FRMD8 and iRhoms might be a  
369 useful target. This is supported, at least in principle, by our observation that even in cells with  
370 complete loss of FRMD8, there is still a low level of mature ADAM17 at the cell surface, and  
371 consequently residual TNF $\alpha$  shedding. Even very efficient pharmacological blocking of the  
372 FRMD8/iRhom interaction would not, therefore, fully abolish inflammatory responses,  
373 potentially reducing side effects. Consistent with this idea, mice with a hypomorphic mutation  
374 in ADAM17 show that even only 5% of normal ADAM17 expression is sufficient to rescue  
375 many aspects of the loss of function phenotype (Chalaris et al., 2010).

376 In conclusion, our work demonstrates the cellular and physiological significance of  
377 FRMD8 binding to iRhoms, and how this stabilises the iRhom/ADAM17 sheddase complex at  
378 the cell surface. It also reinforces the picture that has begun to emerge of ADAM17 not  
379 acting alone but instead being supported by at least two other regulatory proteins that act as  
380 subunits of what is effectively an enzyme complex. This concept would help to explain how  
381 the activity of such a powerful and versatile – and therefore potentially dangerous – shedding  
382 enzyme is controlled with necessary precision. The next steps in fully revealing the role of  
383 FRMD8 will be to analyse the phenotypic consequences of its loss in mice, which should  
384 allow us to understand how the roles of FRMD8 roles in ADAM17 activation, Wnt signalling,  
385 and any other potential functions, are integrated. Notwithstanding these physiological  
386 questions, the work described here already provides a basis for beginning to investigate the  
387 potential of targeting the FRMD8/iRhom interface for modulating the release of ADAM17  
388 substrates.

389

## 390 **Materials and methods**

### 391 *Molecular cloning*

392 Human UNC93B1, human iRhom2<sup>WT</sup>, iRhom2 <sup>$\Delta$ 100</sup>, iRhom2 <sup>$\Delta$ 200</sup>, iRhom2 <sup>$\Delta$ 300</sup>, iRhom2 <sup>$\Delta$ 382</sup>  
393 were amplified from human UNC93B1 (BC025669.1) and iRhom2 cDNA (NM\_024599.2;  
394 Origene (SC122961)) by PCR and cloned with an C-terminal 3xHA tag into the lentiviral  
395 vector pLEX.puro using Gibson assembly (New England Biolabs) following the  
396 manufacturer's instructions. C-terminal V5-tagged FRMD8 (FRMD8-V5) was amplified from  
397 human FRMD8 cDNA (NM\_031904; Addgene (SC107202)) by PCR and cloned into  
398 pcDNA3.1(+) using Gibson assembly. All constructs were verified by Sanger sequencing  
399 (Source Bioscience, Oxford, UK).

400

401 *Transfection and transduction of cell lines*

402 Human embryonic kidney (HEK) 293T and MCF-7 cells were cultured in DMEM  
403 (Sigma) supplemented with 10% fetal calf serum (FCS) and 1x penicillin-streptomycin (PS)  
404 (all Gibco) at 37 °C with 5% CO<sub>2</sub>. Cells were transiently transfected with DNA using FuGENE  
405 HD (Promega). Per 10 cm<sup>2</sup> growth area 4 µl FuGENE HD was added to 1 µg DNA diluted in  
406 OptiMEM (Gibco). The transfection mix was incubated for 20 min at RT and added to cells.  
407 Protein expression was analysed 48 h - 72 h after transfection. For knockdown experiments,  
408 siRNA was transfected using Lipofectamin RNAiMax (Invitrogen) following the  
409 manufacturer's instructions. Per 6 well 50 pmol of FRMD8 SMARTpool siRNA (Dharmacon;  
410 siGENOME Human FRMD8 (83786) siRNA; M-018955-01-0010), non-targeting siRNA  
411 control pools (Dharmacon; siGENOME D-001206-13-50), RHBDF2 siRNA (Thermo Fisher  
412 Scientific; HSS128594 and HSS128595) were used. Protein expression was analysed 72 h  
413 after transfection.

414 HEK293T cell lines stably expressing human UNC93B1-3xHA and human iRhom2-  
415 3xHA were generated by lentiviral transduction using the pLEX.puro vector as previously  
416 described (Adrain et al., 2012). Cells were selected by adding 2.5 µg/ml puromycin (Gibco).

417

418 *Mass spectrometry and data analysis*

419 HEK293T cells expressing human UNC93B1-3xHA (control) and human iRhom2-3xHA  
420 were used for anti-HA co-immunoprecipitation and analysed by mass spectrometry as  
421 described previously in (Grieve et al., 2017). Peptides were injected into a nano-flow  
422 reversed-phase liquid chromatography coupled to Q Exactive Hybrid Quadrupole-Orbitrap  
423 mass spectrometer (Thermo Scientific). The raw data files generated were processed using  
424 the MaxQuant (version 1.5.0.35) software, integrated with the Andromeda search engine as  
425 described previously (Cox and Mann, 2008, Cox et al., 2011). Differential protein abundance  
426 analysis was performed with Perseus (version 1.5.5.3). A two-sample t-test was used to  
427 assess the statistical significance of protein abundance fold-changes. P-values were  
428 adjusted for multiple hypothesis testing with the Benjamini-Hochberg correction (Hochberg  
429 and Benjamini, 1990).

430

431 *Co-immunoprecipitation*

432 Cells were washed with ice-cold PBS and then lysed on ice in Triton X-100 lysis buffer  
433 (1% Triton X-100, 150 mM NaCl, 50 mM Tris-HCl pH 7.5) supplemented with EDTA-free  
434 protease inhibitor mix (Roche) and 10 mM 1,10-Phenanthroline (Sigma). Cell debris were  
435 pelleted by centrifugation at 20,000 g at 4°C for 10 min. Proteins were immunoprecipitated  
436 by incubation with anti-HA magnetic beads (Thermo Scientific) or anti-V5 magnetic beads  
437 (MBL International) for 1 h at 4°C. Beads were washed with Triton X-100 wash buffer (1%  
438 Triton X-100, 300 mM NaCl, 50 mM Tris-HCl pH 7.5). Proteins were eluted in 2x LDS buffer  
439 (life technologies) supplemented with 50 mM DTT for 10 min at 65°C.

440

#### 441 *SDS-PAGE and western blotting*

442 Lysates were mixed with 4x LDS buffer (life technologies) supplemented with 50 mM  
443 DTT and denatured for 10 min at 65°C prior to loading on 4-12% Bis-Tris gradient gels run in  
444 MOPS running buffer (both Invitrogen). Proteins were transferred to a polyvinylidene  
445 difluoride (PVDF) membrane (Millipore) in transfer buffer (Invitrogen). The membrane was  
446 blocked in 5% milk-TBST (150 mM NaCl, 10 mM Tris-HCl pH 7.5, 0.05% Tween 20, 5% dry  
447 milk powder) and then incubated with the primary antibody: mouse monoclonal anti- $\beta$ -actin-  
448 HRP (Sigma, A3854, 1:5000), rabbit polyclonal anti-ADAM17 (abcam; ab39162; 1:2000),  
449 rabbit polyclonal anti-FRMD8 (abcam; ab169933; 1:500), rat monoclonal anti-HA-HRP  
450 (Roche, 11867423001, 1:2000), goat polyclonal anti-V5 (Santa Cruz, sc-83849, 1:2000),  
451 mouse monoclonal anti-transferrin receptor 1, (Thermo Fisher Scientific, 13-6800, 1:2000),  
452 and rabbit polyclonal anti-iRhom2 ((Adrain et al., 2012); 1:500). After three washing steps  
453 with TBST (150 mM NaCl, 10 mM Tris-HCl pH 7.5, 0.05% Tween 20), membranes were  
454 incubated with the secondary antibody for 1 h at RT using either goat polyclonal anti rabbit-  
455 HRP (Sigma, A9169, 1:20000), mouse monoclonal anti-goat-HRP (Santa Cruz, sc-2354,  
456 1:5000) or goat polyclonal anti-mouse-HRP (Santa Cruz, sc-2055, 1:5000).

457

#### 458 *CRISPR/Cas9 genome editing in HEK293T cells*

459 For CRISPR/Cas9-mediated knockout of FRMD8 the plasmid pSpCas9(BB)-2A-Puro  
460 (pX459; Addgene plasmid #48139) co-expressing the wt *Streptococcus pyogenes* Cas9 and  
461 the guide RNA (gRNA) was used. For guide RNA (gRNA) design target sequences with a  
462 low chance of off targets were selected using online tools (<http://crispr.mit.edu>;  
463 <http://www.sanger.ac.uk/htgt/wge>). A gRNA targeting exon 7  
464 (ACCCATAAAACGGCAGCTCGTGG), which is present in all FRMD8 isoforms, was cloned  
465 into pX459 resulting in pX459-FRMD8-exon7 plasmid. 1 µg plasmid was transfected into a 6-  
466 well of HEK293T cells. Cells were selected with puromycin 48 h after transfection to  
467 eliminate non-transfected cells. Single colonies were selected to establish clonal cell lines.  
468 Loss of FRMD8 expression was analysed by western blot and quantitative PCR.

469 CRISPR/Cas9-mediated knock-in of a triple HA tag a homology construct consisting of  
470 the triple HA tag flanked at both sides homology arm of approximately 800 bp was cloned  
471 into pcDNA3.1(+). The *RHBDF2* locus was targeted in exon 19 in close proximity to the stop  
472 codon using gRNA (CCCAGCGGTTCAGTGCAGCACCT or  
473 CAGCGGTTCAGTGCAGCACCTGG) cloned into vector epX459(1.1) (a kind gift from Dr Joey  
474 Rieosaame, University of Oxford). HEK293T cells were treated with 200 ng/ml nocodazole  
475 (Sigma-Aldrich) for 17 h and then transfected with Cas9/sgRNA plasmid and the  
476 pcDNA3.1(+) homology plasmid (0.5 µg each per 6-well). After puromycin selection, single  
477 clones were selected to generate clonal cell lines which were tested for the insertion of the  
478 tag by PCR.

479

#### 480 *mRNA isolation and quantitative RT-PCR*

481 Cells were harvested in PBS and pelleted at 3000 g, 5 min, 4°C. RNA was isolated  
482 using the RNeasy kit (Qiagen) and reverse transcribed using the SuperScript VILO cDNA  
483 synthesis kit (Invitrogen). Resulting cDNA was used for quantitative PCR (qPCR) using the  
484 TaqMan Gene Expression Master Mix (Applied Biosystems) and the following TaqMan  
485 probes (all Thermo Fisher Scientific): human ACTB (Hs99999903\_m1), human FRMD8  
486 (Hs00607699\_mH), human RHBDF2 (Hs00226277\_m1), and human TNFα  
487 (Hs00174128\_m1). qPCR was performed on a StepOnePlus system (Applied Biosystems).  
488 Gene expression was normalized to ACTB expression and expressed as relative quantities  
489 compared to the corresponding wild-type cell line. Error bars indicate the standard derivation  
490 of technical replicates.

491

#### 492 *Shedding assay*

493 8 x 10<sup>4</sup> HEK293T cells were seeded in triplicates per condition into poly-(L)-lysine  
494 (PLL)-coated 24-well plates and transfected the next day with 30 ng plasmid DNA encoding  
495 Alkaline Phosphatase (AP)-conjugated AREG, HB-EGF or TGF $\alpha$  (received from Prof Carl  
496 Blobel). 48 h after transfection, cells were washed with OptiMEM and then incubated with  
497 200  $\mu$ l phenolred-free OptiMEM (Gibco) containing either 200 nM PMA, the corresponding  
498 volume of the solvent (DMSO), or 200 nM PMA and 1  $\mu$ M GW for 30 min at 37°C. Cell  
499 supernatants were collected, the cells were washed in PBS and lysed in 200  $\mu$ l Triton X-100  
500 lysis buffer. The activity of AP in cell lysates and supernatants was determined by incubating  
501 100  $\mu$ l AP substrate p-nitrophenyl phosphate (PNPP) (Thermo Scientific) with 100  $\mu$ l cell  
502 lysate or cell supernatant at RT followed by the measurement of the absorption at 405 nm.  
503 The percentage of AP-conjugated material released from each well was calculated by  
504 dividing the signal from the supernatant by the sum of the signal from lysate and  
505 supernatant. The data was expressed as mean of at least three independent experiments,  
506 each of which contained three biological replicates per condition.

507

#### 508 *Deglycosylation assay*

509 Cells were lysed in Triton X-100 lysis buffer as described above. Lysates were first  
510 denatured with Glycoprotein Denaturing Buffer (New England Biolabs) at 65°C for 15 min  
511 and then treated with endoglycosidase H (Endo H) or peptide:*N*-glycosidase F (PNGase F)  
512 following the manufacturer's instructions (New England Biolabs).

513

#### 514 *Flow cytometry*

515 For ADAM10 and ADAM17 cell surface staining, HEK293T cells were stimulated with  
516 200 nM PMA for 5 min before harvest in PBS. 0.5 x 10<sup>6</sup> HEK293T cells were washed with  
517 ice-cold FACS buffer (0.25% BSA, 0.1 % sodium azide in PBS) and stained with rabbit  
518 polyclonal anti-HA antibody (Santa Cruz (sc-805); 0.5  $\mu$ g diluted in FACS buffer), mouse  
519 monoclonal anti-ADAM10 (Biolegend (352702); 4  $\mu$ g diluted in FACS buffer) or mouse  
520 monoclonal anti-ADAM17 (A300E antibody (Yamamoto et al., 2012); 8  $\mu$ g diluted in FACS  
521 buffer) on ice for 45 min. After two washes with FACS buffer, the cells were incubated with  
522 Alexa Fluor 488-coupled secondary antibody (Invitrogen (A21202 or A21206); 1:1000 dilution  
523 in FACS buffer) on ice for 30 min. Cells were washed twice with ice-cold FACS buffer and  
524 then analysed with a BD FACSCalibur (BD Biosciences) and FlowJo software. Cells stained  
525 only with the secondary antibody or anti-HA negative cells served as control.



526

527 *Culture of human iPSCs*

528 To generate iPSC-derived FRMD8 knockout macrophages, the human iPSC line  
529 AH017-13 was used. The AH017-13 line was derived from dermal fibroblasts of healthy  
530 donor in the James Martin Stem Cell Facility, University of Oxford as published previously  
531 (Fernandes et al., 2016). Donors had given signed informed consent for the derivation of  
532 human iPSC lines from skin biopsies and SNP analysis (Ethics Committee: National Health  
533 Service, Health Research Authority, NRES Committee South Central, Berkshire, UK (REC  
534 10/H0505/71)). AH017-13 iPSCs were cultured feeder cell-free in mTeSR1 (STEMCELL  
535 Technologies) on hESC-qualified geltrex (Gibco). iPSCs were fed daily and routinely  
536 passaged with 0.5 mM EDTA, or when required using TrypLE (Gibco) and plated in media  
537 containing 10 µmol/l Rho-kinase inhibitor Y-27632 (Abcam).

538

539 *Genome editing of iPSCs lines*

540 AH017-13 iPSCs were transfected by electroporation using the Neon Transfection  
541 System (Invitrogen).  $3 \times 10^6$  AH017-13 iPSCs were electroporated (1400 mV, 20 ms, 1  
542 pulse) in a 100 µl tip with 15 µg pX459-FRMD8-exon7 plasmid DNA (endotoxin-free quality),  
543 then plated at a density of  $4 \times 10^5$  cells/cm<sup>2</sup> and selected 48 h after transfection with 0.25  
544 µg/ml puromycin. After 48 h of selection, surviving cells were plated on a feeder-layer of  $4 \times$   
545  $10^6$  irradiated mouse embryonic fibroblasts (MEFs) in 0.1% gelatin-coated 10 cm culture  
546 dishes and cultured in hES medium (KnockOut DMEM, 20% KnockOut serum replacement,  
547 2 mM L-Glutamine, 100 µM nonessential amino acids, 50 µM 2-Mercaptoethanol (all Gibco)  
548 and 10 ng/mL basic fibroblastic growth factor (bFGF, R&D)). Colonies were manually  
549 selected and grown on geltrex in mTeSR1. Clones were analysed by western blot using the  
550 anti-FRMD8 antibody, and PCR followed by Sanger sequencing. For PCR DNA was isolated  
551 from iPSCs by incubation in DNA isolation buffer (10 mM Tris-HCl (pH 8), 1 mM EDTA, 25  
552 mM NaCl, 200 µg/ml proteinase K added freshly) at 65°C for 30 min. Proteinase K was  
553 inactivated at 95°C for 2 min. PCR using Q5 polymerase was performed according to the  
554 manufacturer's instructions (New England Biolabs) using primers FRMD8\_fw  
555 (TGCAGATCCATGACGAGGA) and FRMD8\_rev (GTGCTCGTGACAAGACAC). The PCR  
556 product was purified and sequenced using the primer FRMD8\_exon7\_fw  
557 (GCCAGAGTCTCTTTGCTG) for Sanger sequencing (Source Bioscience, Oxford).

558

559 *Differentiation of iPSCs into macrophages*

560 AH017-13 wild-type and FRMD8 knockout clones were analysed by Illumina  
561 HumanOmniExpress24 single nucleotide polymorphism (SNP) array at the Wellcome Trust  
562 Centre for Human Genetics at the University of Oxford and assessed using KaryoStudio  
563 software to confirm normal karyotypes before differentiation into macrophages. For this study  
564 iPSCs were differentiated into embryoid bodies (EBs) by mechanical lifting of iPSC colonies  
565 and differentiated into macrophages as described in (van Wilgenburg et al., 2013). Briefly,  
566 iPSCs were grown on a feeder layer of MEFs in hES medium. A dense 10 cm<sup>2</sup> well of iPSCs  
567 was scored into 10x 10 sections using a plastic pipette tip. The resulting 100 patches were  
568 lifted with a cell scraper and cell clumps were transferred into a 6-well ultra-low adherence  
569 plate (Corning) containing EB formation medium (hES medium supplemented with 50ng/ml  
570 BMP4 (Invitrogen), 50ng/ml VEGF (Peprotech) and 20 ng/ml SCF (Miltenyi)) to form EBs. A  
571 50% medium change was performed every second day. On day 5 EBs were harvested.  
572 Approximately 60-80 EBs were transferred into a T75 flask containing factory medium (X-  
573 VIVO 15 (Lonza) supplemented with 2 mM L-Glutamine, 50 µM 2-Mercaptoethanol, 100  
574 ng/ml M-CSF and 25 ng/mL IL-3, 100 U/ml penicillin and 100 µg/ml streptomycin (all Gibco)).  
575 The EBs were fed weekly with fresh factory medium. After approximately two weeks EBs  
576 started to produce non-adherent macrophage precursors, which were harvested from the  
577 supernatant of EB cultures through a 70 µM cell strainer. Cells were differentiated into  
578 mature adherent macrophages for 7 days in macrophage medium (X-VIVO 15 supplemented  
579 with 2 mM L-Glutamine, 100 ng/ml M-CSF, 100 U/ml penicillin and 100 µg/ml streptomycin).

580

581 *ELISA*

582 iPSC-derived macrophages were harvested from EB cultures, counted and seeded at  
583 25,000 cells per well into 96-well tissue culture plates in triplicates per condition.  
584 Macrophages were cultured in macrophage differentiation medium for 7 days, and then  
585 activated with 50 ng/ml LPS (Sigma-Aldrich) in fresh macrophage differentiation medium for  
586 4 h. For inhibitor treatments cells were incubated with 50 ng/ml LPS and 3  $\mu$ M GW or GI for 4  
587 h. Cell culture supernatants were collected and cleared from cells by centrifugation. TNF $\alpha$  in  
588 supernatants was measured by ELISA (Human TNF alpha ELISA Ready-SET-Go,  
589 eBioscience (88-7346-86)) according to the manufacturer's instructions. Macrophages were  
590 lysed in Triton X-100 lysis buffer and protein concentration was determined using a BCA  
591 assay (Thermo Scientific). The amount of TNF $\alpha$  in the supernatant was normalised to the  
592 protein concentration of the corresponding cell lysate to adjust for differences in TNF $\alpha$   
593 release due to cell numbers.

594

#### 595 *Mouse work*

596 Commercially available *Frmd8*<sup>-/-</sup> mouse ES cells from KOMP Repository at UC Davis  
597 were used to generate *Frmd8*<sup>-/-</sup> mice. The mouse ES cells (C57BL/6NTac strain) were  
598 injected into blastocysts of Balb/c mice. Chimeras were bred to C57BL/6 to generate  
599 *Frmd8*<sup>+/-</sup> mice that were used for breeding of the colony and the generation of *Frmd8*<sup>-/-</sup> mice.  
600 The mouse work was performed under project licenses 80/2584 and 30/2306. Mouse tissues  
601 were collected from sacrificed animals and stored on dry ice or at -80°C. Tissues were lysed  
602 in Triton X-100 RIPA buffer (1% Triton X-100, 150 mM NaCl, 50 mM Tris-HCl (pH 7.5), 0.1%  
603 SDS, 0.5% sodium deoxycholate) supplemented with EDTA-free protease inhibitor mix and  
604 10 mM 1,10-Phenanthroline using a tissue homogeniser (Omni International). Lysates were  
605 cleared from cell debris by centrifugation (20,000 g, 4°C, 10 min). Protein concentrations of  
606 tissue lysates were determined using a BCA assay.

607

#### 608 *Statistical analysis and data presentation*

609 Values are expressed as means of at least three independent experiments with error  
610 bars representing the standard deviation. Unpaired, two-tailed t-tests were used for statistical  
611 analysis. Shedding assays and ELISA data was analysed using a Mann-Whitney test. Flow  
612 cytometry blots shown represent one from at least three experiments with similar outcome.

## 613 **Acknowledgements**

614 We gratefully acknowledge the support of Oxford's Advanced Proteomics Facility for  
615 our mass spectrometry based proteomic screen and Monika Stegmann for statistical analysis  
616 of the results. We also thank Genome Engineering Oxford, specifically Joey Riepsaame and  
617 Andrew Bassett, who helped us to design and clone guide RNAs for CRISPR/Cas9 gene  
618 editing. We are thankful for the assistance in animal work from the staff of the mouse facility  
619 and for support from Elizabeth Robertson, Jonathan Godwin, Angela Moncada Pazos, and  
620 Clémence Levet. Immunofluorescent microscopy was performed in Oxford's Micron imaging  
621 facility. We thank members of the Freeman lab for their extensive support throughout this  
622 project and their advice on the manuscript. We thank Stefan Düsterhöft and Boris Sieber for  
623 providing reagents. This research was supported by the Wellcome Trust to MF (grant  
624 number 101035/Z/13/Z). The James Martin Stem Cell Facility has received support from the  
625 Wellcome Trust ISSF (121302) and MRC (MC\_EX\_MR/N50192X/1). UK is supported by the  
626 Medical Research Council (award number 1374214) and a Boehringer Ingelheim Fonds PhD  
627 fellowship. AG received funding from the European Union's Horizon 2020 research and  
628 innovation programme under the Marie Skłodowska-Curie grant agreement No 659166.

629

## 630 **Author contributions**

631 Conceptualization, U.K., A.G.G., and M.F.; Methodology, U.K., Y.M., and S.A.C.;  
632 Investigation, U.K.; Writing, U.K. and M.F.; Funding Acquisition, M.F.

633

## 634 **Conflict of interest**

635 The authors have no conflict of interest.

636

## 637 **References**

- 638 Adrain, C., Zettl, M., Christova, Y., Taylor, N. & Freeman, M. 2012. Tumor necrosis factor  
639 signaling requires iRhom2 to promote trafficking and activation of TACE. *Science*,  
640 335, 225-8.
- 641 Black, R. A., Rauch, C. T., Kozlosky, C. J., Peschon, J. J., Slack, J. L., Wolfson, M. F.,  
642 Castner, B. J., Stocking, K. L., Reddy, P., Srinivasan, S., Nelson, N., Boiani, N.,  
643 Schooley, K. A., Gerhart, M., Davis, R., Fitzner, J. N., Johnson, R. S., Paxton, R. J.,  
644 March, C. J. & Cerretti, D. P. 1997. A metalloproteinase disintegrin that releases  
645 tumour-necrosis factor-alpha from cells. *Nature*, 385, 729-33.
- 646 Blaydon, D. C., Etheridge, S. L., Risk, J. M., Hennies, H. C., Gay, L. J., Carroll, R., Plagnol,  
647 V., Mcronald, F. E., Stevens, H. P., Spurr, N. K., Bishop, D. T., Ellis, A., Jankowski,  
648 J., Field, J. K., Leigh, I. M., South, A. P. & Kelsell, D. P. 2012. RHBDF2 mutations are

- 649 associated with tylosis, a familial esophageal cancer syndrome. *Am J Hum Genet*,  
650 90, 340-6.
- 651 Cavadas, M., Oikonomidi, I., Gaspar, C. J., Burbridge, E., Badenes, M., Felix, I., Bolado, A.,  
652 Hu, T., Bileck, A., Gerner, C., Domingos, P. M., Von Kriegsheim, A. & Adrain, C.  
653 2017. Phosphorylation of iRhom2 Controls Stimulated Proteolytic Shedding by the  
654 Metalloprotease ADAM17/TACE. *Cell Rep*, 21, 745-757.
- 655 Chalaris, A., Adam, N., Sina, C., Rosenstiel, P., Lehmann-Koch, J., Schirmacher, P.,  
656 Hartmann, D., Cichy, J., Gavrilova, O., Schreiber, S., Jostock, T., Matthews, V.,  
657 Hasler, R., Becker, C., Neurath, M. F., Reiss, K., Saftig, P., Scheller, J. & Rose-John,  
658 S. 2010. Critical role of the disintegrin metalloprotease ADAM17 for intestinal  
659 inflammation and regeneration in mice. *J Exp Med*, 207, 1617-24.
- 660 Christova, Y., Adrain, C., Bambrough, P., Ibrahim, A. & Freeman, M. 2013. Mammalian  
661 iRhoms have distinct physiological functions including an essential role in TACE  
662 regulation. *EMBO Rep*, 14, 884-90.
- 663 Cox, J. & Mann, M. 2008. MaxQuant enables high peptide identification rates, individualized  
664 p.p.b.-range mass accuracies and proteome-wide protein quantification. *Nat*  
665 *Biotechnol*, 26, 1367-1372.
- 666 Cox, J., Neuhauser, N., Michalski, A., Scheltema, R. A., Olsen, J. V. & Mann, M. 2011.  
667 Andromeda: A Peptide Search Engine Integrated into the MaxQuant Environment. *J*  
668 *Proteome Res*, 10, 1794-1805.
- 669 Endres, K., Anders, A., Kojro, E., Gilbert, S., Fahrenholz, F. & Postina, R. 2003. Tumor  
670 necrosis factor-alpha converting enzyme is processed by proprotein-convertases to  
671 its mature form which is degraded upon phorbol ester stimulation. *Eur J Biochem*,  
672 270, 2386-2393.
- 673 Fernandes, H. J., Hartfield, E. M., Christian, H. C., Emmanoulidou, E., Zheng, Y., Booth, H.,  
674 Bogetofte, H., Lang, C., Ryan, B. J., Sardi, S. P., Badger, J., Vowles, J., Evetts, S.,  
675 Tofaris, G. K., Vekrellis, K., Talbot, K., Hu, M. T., James, W., Cowley, S. A. & Wade-  
676 Martins, R. 2016. ER Stress and Autophagic Perturbations Lead to Elevated  
677 Extracellular alpha-Synuclein in GBA-N370S Parkinson's iPSC-Derived Dopamine  
678 Neurons. *Stem Cell Reports*, 6, 342-56.
- 679 Freeman, M. 2014. The rhomboid-like superfamily: molecular mechanisms and biological  
680 roles. *Annu Rev Cell Dev Biol*, 30, 235-54.
- 681 Grieve, A. G., Xu, H., Kunzel, U., Bambrough, P., Sieber, B. & Freeman, M. 2017.  
682 Phosphorylation of iRhom2 at the plasma membrane controls mammalian TACE-  
683 dependent inflammatory and growth factor signalling. *Elife*, 6.
- 684 Hochberg, Y. & Benjamini, Y. 1990. More Powerful Procedures for Multiple Significance  
685 Testing. *Stat Med*, 9, 811-818.

- 686 Hosur, V., Johnson, K. R., Burzenski, L. M., Stearns, T. M., Maser, R. S. & Shultz, L. D.  
687 2014. Rhbdf2 mutations increase its protein stability and drive EGFR hyperactivation  
688 through enhanced secretion of amphiregulin. *Proc Natl Acad Sci U S A*, 111, E2200-  
689 9.
- 690 Issuree, P. D., Maretzky, T., Mcilwain, D. R., Monette, S., Qing, X., Lang, P. A., Swendeman,  
691 S. L., Park-Min, K. H., Binder, N., Kalliolias, G. D., Yarilina, A., Horiuchi, K., Ivashkiv,  
692 L. B., Mak, T. W., Salmon, J. E. & Blobel, C. P. 2013. iRHOM2 is a critical pathogenic  
693 mediator of inflammatory arthritis. *J Clin Invest*, 123, 928-32.
- 694 Johnson, K. R., Lane, P. W., Cook, S. A., Harris, B. S., Ward-Bailey, P. F., Bronson, R. T.,  
695 Lyons, B. L., Shultz, L. D. & Davisson, M. T. 2003. Curly bare (cub), a new mouse  
696 mutation on chromosome 11 causing skin and hair abnormalities, and a modifier  
697 gene (mcub) on chromosome 5. *Genomics*, 81, 6-14.
- 698 Kalliolias, G. D. & Ivashkiv, L. B. 2016. TNF biology, pathogenic mechanisms and emerging  
699 therapeutic strategies. *Nat Rev Rheumatol*, 12, 49-62.
- 700 Kategaya, L. S., Changkakoty, B., Biechele, T., Conrad, W. H., Kaykas, A., Dasgupta, R. &  
701 Moon, R. T. 2009. Bili inhibits Wnt/beta-catenin signaling by regulating the  
702 recruitment of axin to LRP6. *PLoS One*, 4, e6129.
- 703 Koehn, J., Huesken, D., Jaritz, M., Rot, A., Zurini, M., Dwertmann, A., Beutler, B. &  
704 Korthauer, U. 2007. Assessing the function of human UNC-93B in Toll-like receptor  
705 signaling and major histocompatibility complex II response. *Hum Immunol*, 68, 871-8.
- 706 Li, X., Maretzky, T., Weskamp, G., Monette, S., Qing, X., Issuree, P. D., Crawford, H. C.,  
707 Mcilwain, D. R., Mak, T. W., Salmon, J. E. & Blobel, C. P. 2015. iRhoms 1 and 2 are  
708 essential upstream regulators of ADAM17-dependent EGFR signaling. *Proc Natl*  
709 *Acad Sci U S A*, 112, 6080-5.
- 710 Lichtenthaler, S. F. 2013. iRHOM2 takes control of rheumatoid arthritis. *J Clin Invest*, 123,  
711 560-2.
- 712 Luo, W. W., Li, S., Li, C., Lian, H., Yang, Q., Zhong, B. & Shu, H. B. 2016. iRhom2 is  
713 essential for innate immunity to DNA viruses by mediating trafficking and stability of  
714 the adaptor STING. *Nat Immunol*, 17, 1057-66.
- 715 Maney, S. K., Mcilwain, D. R., Polz, R., Pandyra, A. A., Sundaram, B., Wolff, D., Ohishi, K.,  
716 Maretzky, T., Brooke, M. A., Evers, A., Vasudevan, A. A., Aghaeepour, N., Scheller,  
717 J., Munk, C., Haussinger, D., Mak, T. W., Nolan, G. P., Kelsell, D. P., Blobel, C. P.,  
718 Lang, K. S. & Lang, P. A. 2015. Deletions in the cytoplasmic domain of iRhom1 and  
719 iRhom2 promote shedding of the TNF receptor by the protease ADAM17. *Sci Signal*,  
720 8, ra109.

- 721 Maretzky, T., Mcilwain, D. R., Issuree, P. D., Li, X., Malapeira, J., Amin, S., Lang, P. A., Mak,  
722 T. W. & Blobel, C. P. 2013. iRhom2 controls the substrate selectivity of stimulated  
723 ADAM17-dependent ectodomain shedding. *Proc Natl Acad Sci U S A*, 110, 11433-8.
- 724 Mcilwain, D. R., Lang, P. A., Maretzky, T., Hamada, K., Ohishi, K., Maney, S. K., Berger, T.,  
725 Murthy, A., Duncan, G., Xu, H. C., Lang, K. S., Haussinger, D., Wakeham, A., Itie-  
726 Youten, A., Khokha, R., Ohashi, P. S., Blobel, C. P. & Mak, T. W. 2012. iRhom2  
727 regulation of TACE controls TNF-mediated protection against *Listeria* and responses  
728 to LPS. *Science*, 335, 229-32.
- 729 Monaco, C., Nanchahal, J., Taylor, P. & Feldmann, M. 2015. Anti-TNF therapy: past, present  
730 and future. *Int Immunol*, 27, 55-62.
- 731 Moss, M. L., Jin, S. L., Milla, M. E., Bickett, D. M., Burkhart, W., Carter, H. L., Chen, W. J.,  
732 Clay, W. C., Didsbury, J. R., Hassler, D., Hoffman, C. R., Kost, T. A., Lambert, M. H.,  
733 Leesnitzer, M. A., Mccauley, P., Mcgeehan, G., Mitchell, J., Moyer, M., Pahel, G.,  
734 Rocque, W., Overton, L. K., Schoenen, F., Seaton, T., Su, J. L., Becherer, J. D. & Et  
735 Al. 1997. Cloning of a disintegrin metalloproteinase that processes precursor tumour-  
736 necrosis factor-alpha. *Nature*, 385, 733-6.
- 737 Nakagawa, T., Guichard, A., Castro, C. P., Xiao, Y., Rizen, M., Zhang, H. Z., Hu, D., Bang,  
738 A., Helms, J., Bier, E. & Derynck, R. 2005. Characterization of a human rhomboid  
739 homolog, p100hRho/RHBDF1, which interacts with TGF-alpha family ligands. *Dev*  
740 *Dyn*, 233, 1315-31.
- 741 Rose-John, S. 2013. ADAM17, shedding, TACE as therapeutic targets. *Pharmacol Res*, 71,  
742 19-22.
- 743 Saarinen, S., Vahteristo, P., Lehtonen, R., Aittomaki, K., Launonen, V., Kiviluoto, T. &  
744 Aaltonen, L. A. 2012. Analysis of a Finnish family confirms RHBDF2 mutations as the  
745 underlying factor in tylosis with esophageal cancer. *Fam Cancer*, 11, 525-8.
- 746 Sahin, U. & Blobel, C. P. 2007. Ectodomain shedding of the EGF-receptor ligand epigen is  
747 mediated by ADAM17. *FEBS Lett*, 581, 41-4.
- 748 Sahin, U., Weskamp, G., Kelly, K., Zhou, H. M., Higashiyama, S., Peschon, J., Hartmann, D.,  
749 Saftig, P. & Blobel, C. P. 2004. Distinct roles for ADAM10 and ADAM17 in  
750 ectodomain shedding of six EGFR ligands. *J Cell Biol*, 164, 769-79.
- 751 Schlondorff, J., Becherer, J. D. & Blobel, C. P. 2000. Intracellular maturation and localization  
752 of the tumour necrosis factor alpha convertase (TACE). *Biochem J*, 347 Pt 1, 131-8.
- 753 Siggs, O. M., Grieve, A., Xu, H., Bambrough, P., Christova, Y. & Freeman, M. 2014. Genetic  
754 interaction implicates iRhom2 in the regulation of EGF receptor signalling in mice.  
755 *Biol Open*, 3, 1151-7.

- 756 Tyanova, S., Temu, T., Sinitcyn, P., Carlson, A., Hein, M. Y., Geiger, T., Mann, M. & Cox, J.  
757 2016. The Perseus computational platform for comprehensive analysis of  
758 (prote)omics data. *Nat Methods*, 13, 731-40.
- 759 Van Wilgenburg, B., Browne, C., Vowles, J. & Cowley, S. A. 2013. Efficient, long term  
760 production of monocyte-derived macrophages from human pluripotent stem cells  
761 under partly-defined and fully-defined conditions. *PLoS One*, 8, e71098.
- 762 Yamamoto, K., Trad, A., Baumgart, A., Huske, L., Lorenzen, I., Chalaris, A., Grotzinger, J.,  
763 Dechow, T., Scheller, J. & Rose-John, S. 2012. A novel bispecific single-chain  
764 antibody for ADAM17 and CD3 induces T-cell-mediated lysis of prostate cancer cells.  
765 *Biochem J*, 445, 135-44.
- 766 Zunke, F. & Rose-John, S. 2017. The shedding protease ADAM17: Physiology and  
767 pathophysiology. *Biochim Biophys Acta*.
- 768



769 **Figures and figure legends**

770

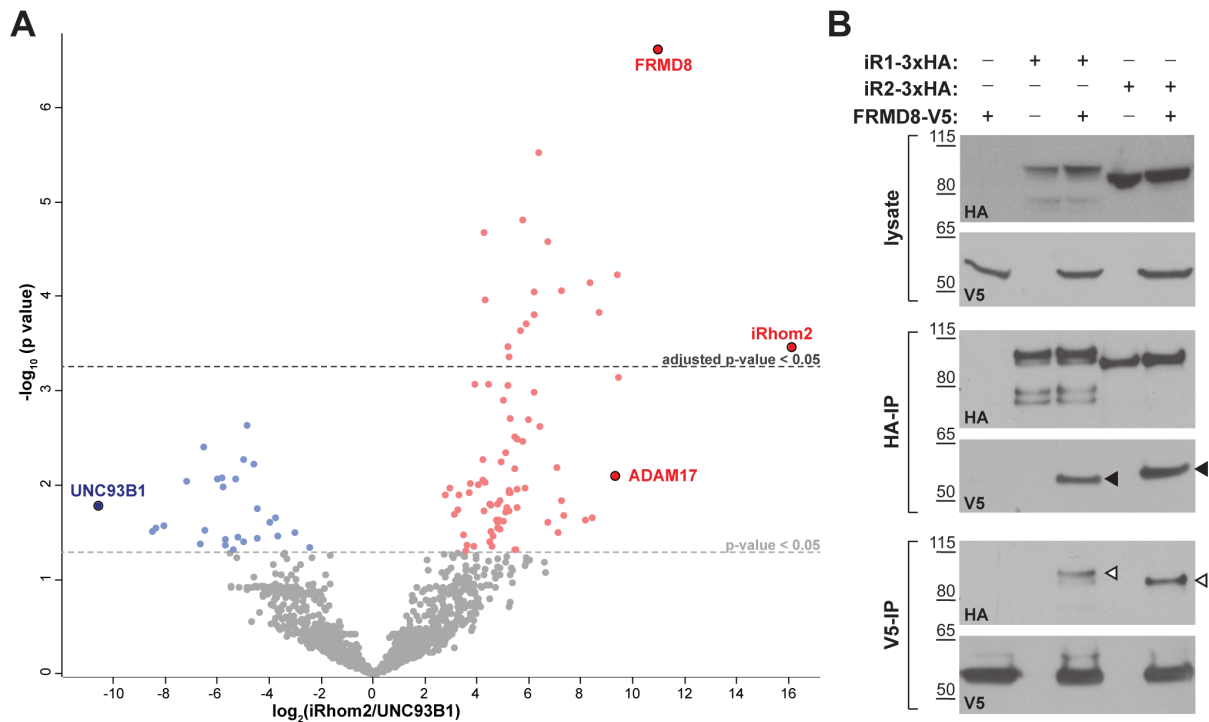

771

772 **Figure 1 - FRMD8 is a novel interaction partner of iRhom1 and iRhom2.**

773 **A** Volcano plot representing results from three iRhom2 co-immunoprecipitations. The fold  
 774 change of label-free quantification values (in log<sub>2</sub> ratio) was plotted against the p value (-  
 775 log<sub>10</sub> transformed). The grey dotted line indicates p-values < 0.05 (analysed with a two-  
 776 sample t-test). Benjamini-Hochberg correction was applied to adjust the p-value for multiple  
 777 hypothesis testing (dark grey dotted line).

778 **B** Lysates of HEK293T cells stably expressing human iRhom1-3xHA or iRhom2-3xHA  
 779 transfected with human FRMD8-V5 (where indicated) were subjected to anti-HA and anti-V5  
 780 immunoprecipitation (HA-IP, V5-IP) and a western blot using anti-HA and anti-V5 antibodies  
 781 was performed. Black arrowheads indicated the co-immunoprecipitated FRMD8-V5; white  
 782 arrowheads indicated the co-immunoprecipitated iRhoms.

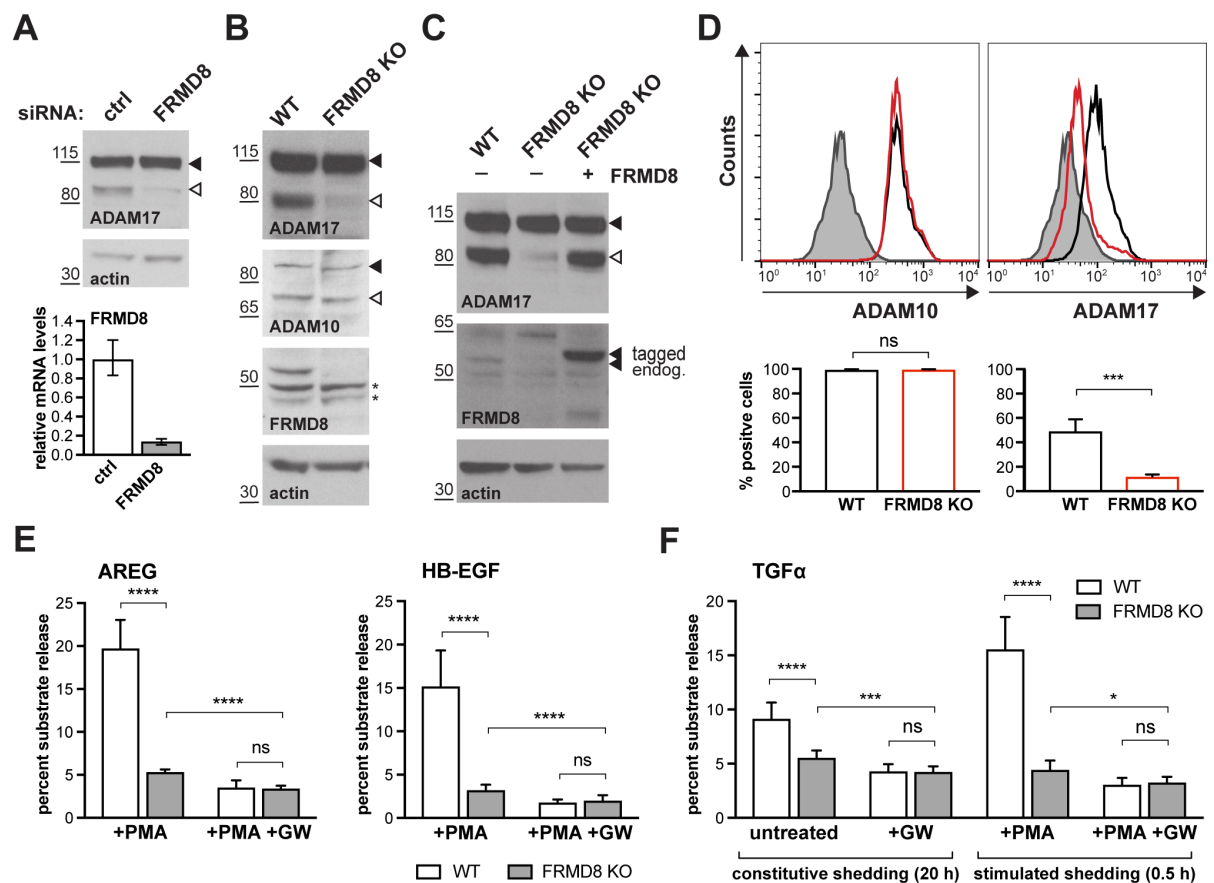

783

784

**Figure 2 - FRMD8 loss reduces mature ADAM17 levels and impairs ADAM17-dependent shedding activity.**

785

786 **A** ADAM17 levels were analysed in HEK293T cells transfected with non-targeting siRNA  
 787 control pool (ctrl) or FRMD8 SMARTpool siRNA after western blotting with anti-ADAM17 and  
 788 anti-actin staining. In this and subsequent figures, pro- and mature form of ADAM17 are  
 789 indicated with black and white arrowheads, respectively. Lower panel: Knockdown efficiency  
 790 of FRMD8 was analysed by TaqMan PCR.

791 **B, C** Lysates from wild-type (WT) and FRMD8 knockout (KO) HEK293T cells were  
 792 transiently transfected with FRMD8-V5 (where indicated) and immunoblotted for endogenous  
 793 ADAM17, ADAM10, FRMD8 and actin using western blotting. Nonspecific bands are marked  
 794 with an asterisk.

795 **D** Cell surface levels of endogenous ADAM10 and ADAM17 were analysed in WT and  
 796 FRMD8 KO HEK293T cells after stimulation with 200 nM PMA for 5 min. Unpermeabilised  
 797 cells were stained on ice with ADAM10 and ADAM17 antibodies, or only with secondary  
 798 antibody as a control (grey). The immunostaining was analysed by flow cytometry. The graph  
 799 shown is one representative experiment out of four biological replicates. The percentage of  
 800 positive cells was calculated for each experiment using FlowJo software. Statistical analysis  
 801 was performed using an unpaired t-test.

802 **E, F** WT and FRMD8 KO HEK293T cells were transiently transfected with alkaline  
 803 phosphatase (AP)-tagged AREG, HB-EGF or TGFα, and then either incubated with 200 nM

804 PMA, with 200 nM PMA and 1  $\mu$ M GW (ADAM10/ADAM17 inhibitor), or with DMSO for 30  
805 min. In addition, cells transfected with AP-TGF $\alpha$  were either left unstimulated for 20 h or  
806 incubated with GW for 20 h. AP activity was measured in supernatants and cell lysates. Each  
807 experiment was performed in biological triplicates. The results of three independent shedding  
808 experiments are shown. Statistical analysis was performed of using a Mann-Whitney test. ns  
809 = p-value > 0.05; \* = p-value < 0.05; \*\*\* = p-value < 0.001; \*\*\*\* = p-value < 0.0001.

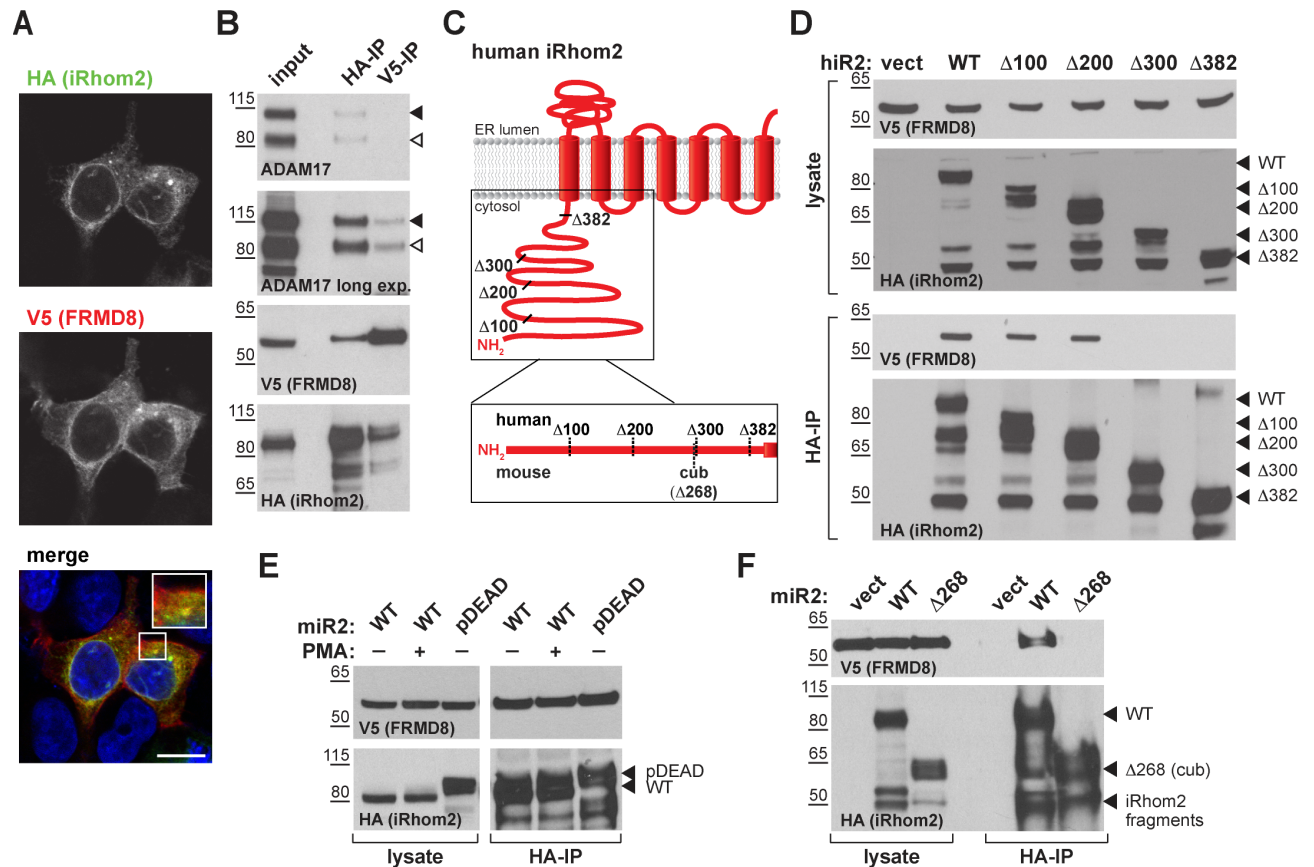

810

811 **Figure 3 - FRMD8 binds to the iRhom2 N-terminus throughout the entire secretory**  
 812 **pathway.**

813 **A** MCF-7 cells were transfected with human iRhom2-3xHA and FRMD8-V5 and stained  
 814 using 4',6-diamidino-2-phenylindole (DAPI; blue; to mark nuclei), anti-HA and anti-V5  
 815 antibodies. Cells were imaged on a confocal fluorescent microscope. Scale bar: 10  $\mu$ m.

816 **B** Lysates from anti-HA and anti-V5 immunoprecipitation (HA-IP, V5-IP) of HEK293T cells  
 817 co-expressing human iRhom2-3xHA and human FRMD8-V5 were immunoblotted for  
 818 ADAM17, HA and V5.

819 **C** Schematic representation of truncated human and mouse iRhom2 constructs used in (D)  
 820 and (F).

821 **D, E, F** Lysates and anti-HA immunoprecipitation (HA-IP) from HEK293T cells transiently  
 822 transfected with FRMD8-V5 and either empty vector (vect), truncated human iRhom2-3xHA  
 823 constructs (D), mouse iRhom2<sup>WT</sup> (WT) and iRhom2<sup>pDEAD</sup> (pDEAD) (E) or mouse iRhom2<sup>WT</sup>  
 824 and Rhom2<sup>cub</sup> ( $\Delta$ 268) (F) were immunoblotted for V5 and HA. Where indicated cells have  
 825 been stimulated with 200 nM PMA for 30 min.

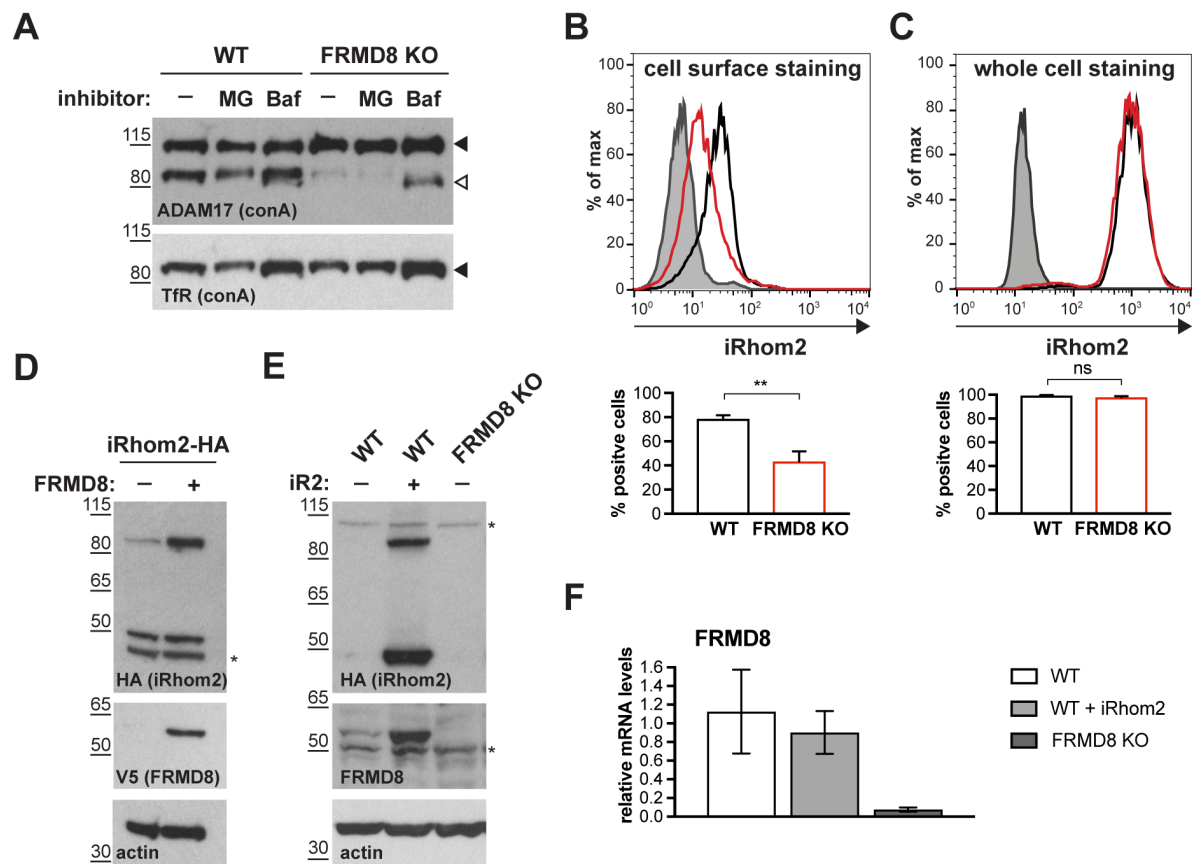

826

827 **Figure 4 - FRMD8 loss leads to the destabilisation of ADAM17 and iRhom2.**

828 **A** Cell lysates of wild-type (WT) and FRMD8 knockout (KO) HEK293T cells treated with the  
 829 solvent DMSO (-), 10  $\mu$ M MG-132 (MG) or 200 nM bafilomycin A1 (Baf) for 16 h were  
 830 enriched for glycosylated proteins using concanavalin A (conA) beads and immunoblotted for  
 831 ADAM17 and transferrin receptor 1 (TfR). TfR was used as a loading control although it is  
 832 also susceptible to bafilomycin treatment.

833 **B** Unpermeabilised WT (black) and FRMD8 KO HEK293T cells stably expressing  
 834 human iRhom2-3xHA were immunostained on ice for HA. Wild-type HEK293T cells  
 835 immunostained for HA served as a negative control (grey).

836 **C** Cells were permeabilised and stained at room temperature with an anti-HA antibody.  
 837 Immunostaining with the Alexa Fluor 488-coupled secondary antibody served as a control  
 838 (grey). In (B & C), the flow cytometry graphs shown are one representative experiment out of  
 839 three experiments. The percentage of positive cells was calculated for each experiment  
 840 using FlowJo software. Statistical analysis was performed using an unpaired t-test; ns = p-  
 841 value > 0.05; \*\* = p-value < 0.01.

842 **D** Lysates of HEK293T cells stably expressing human iRhom2-3xHA and transfected with  
 843 FRMD8-V5 (where indicated) were analysed by western blot for iRhom2 levels using anti-  
 844 HA, anti-V5 and anti-actin immunostaining. Nonspecific bands are marked with an asterisk  
 845 (\*).

846 **E** Lysates of WT and FRMD8 KO HEK293T cells stably expressing human iRhom2-3xHA  
847 (where indicated) were immunoblotted for HA, FRMD8 and actin. An asterisk (\*) marks a  
848 nonspecific band.

849 **F** FRMD8 mRNA levels relative to actin mRNA levels were determined by TaqMan PCR in  
850 cells used in (E).

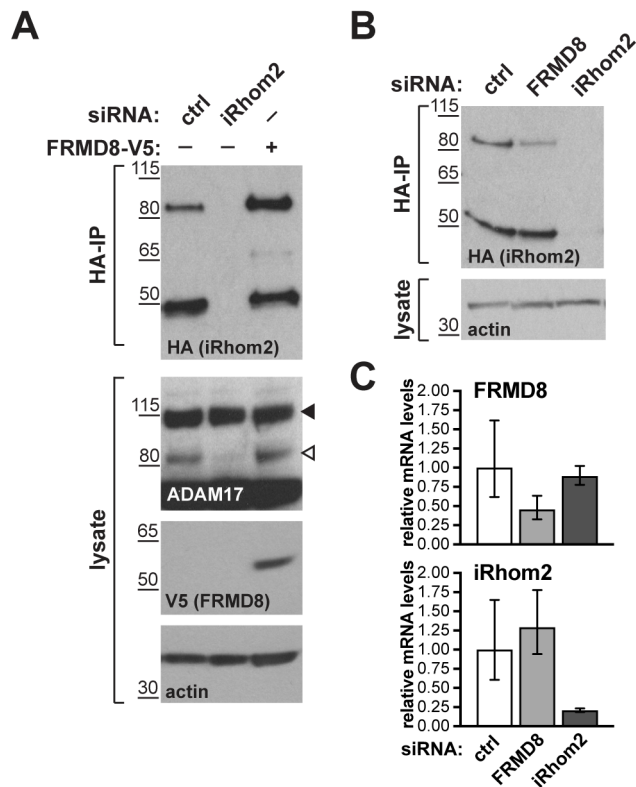

851

852 **Figure 5 - FRMD8 stabilises endogenous iRhom2.**

853 **A, B** Levels of endogenously 3xHA tagged iRhom2 were analysed in HEK293T-iRhom2-  
854 3xHA cells transfected with FRMD8-V5 plasmid, siRNAs targeting iRhom2, non-targeting  
855 siRNA control pool (ctrl) or FRMD8 SMARTpool siRNA. Cell lysates were anti-HA  
856 immunoprecipitated (HA-IP) to detect endogenous iRhom2-3xHA levels and immunoblotted  
857 using anti-HA antibody. Cell lysates were immunoblotted for ADAM17, V5, and actin.

858 **C** FRMD8 and iRhom2 mRNA levels relative to actin mRNA levels were determined by  
859 TaqMan PCR in cells used for the experiment shown in (B) to demonstrate that the  
860 destabilisation of endogenous iRhom2 was not induced by a change in iRhom2 mRNA  
861 levels.

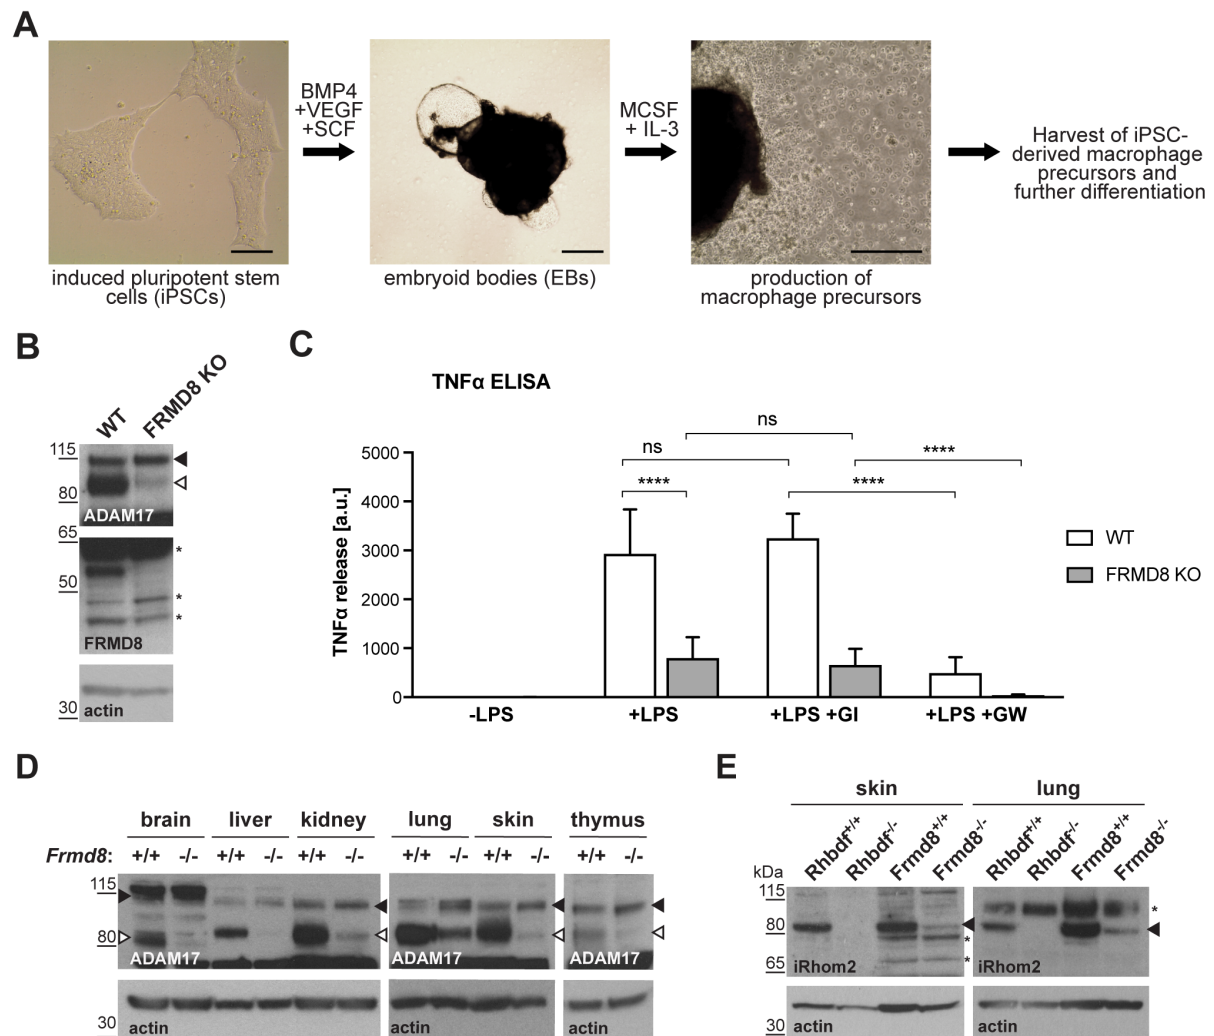

862

863 **Figure 6 - FRMD8 is required for TNF $\alpha$  release in human iPSC-derived macrophages.**

864 **A** Schematic representation of the differentiation protocol of iPSCs into macrophages based  
865 on (van Wilgenburg et al., 2013). Scale bars: 10  $\mu$ m.

866 **B** Lysates of iPSC-derived macrophages (on day 7 after harvest from EBs) were  
867 immunoblotted for ADAM17, FRMD8, and actin.

868 **C** 25,000 iPSC-derived macrophages were either left unstimulated, stimulated with 50 ng/ml  
869 LPS, or with 50 ng/ml LPS and simultaneously with 2  $\mu$ M GI or 2  $\mu$ M GW for 4 h. TNF $\alpha$   
870 concentration in the cell supernatants was measured by ELISA and then normalised to the  
871 protein concentration in macrophage cell lysates to adjust the cytokine release for potential  
872 differences in cell numbers. Each experiment was performed in biological triplicates. Data  
873 from three independent experiments were statistically analysed using a Mann-Whitney test;  
874 ns = p-value > 0.05; \*\*\*\* = p-value < 0.0001.

875 **D, E** Lysates from tissues derived from *Frmd8*<sup>-/-</sup> or *Rhbd2*<sup>-/-</sup> and their wild-type littermates  
876 were immunoblotted for ADAM17, iRhom2 and actin.



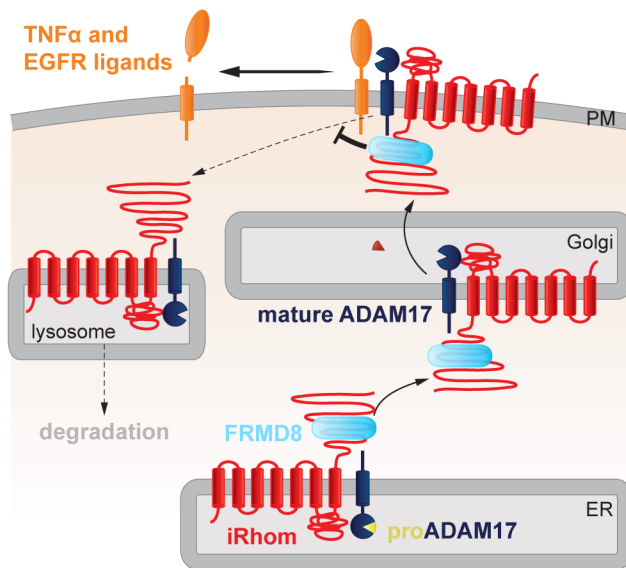

877

878 **Figure 7 - FRMD8 stabilises the iRhomb2/ADAM17 sheddase complex.**

879 Schematic representation of the role of FRMD8 in the iRhomb2/ADAM17 pathway: under wild-  
880 type conditions ADAM17 and iRhomb2 are stabilised by FRMD8 and thereby protected from  
881 degradation through the endolysosomal pathway.

882 **Supplementary figures**

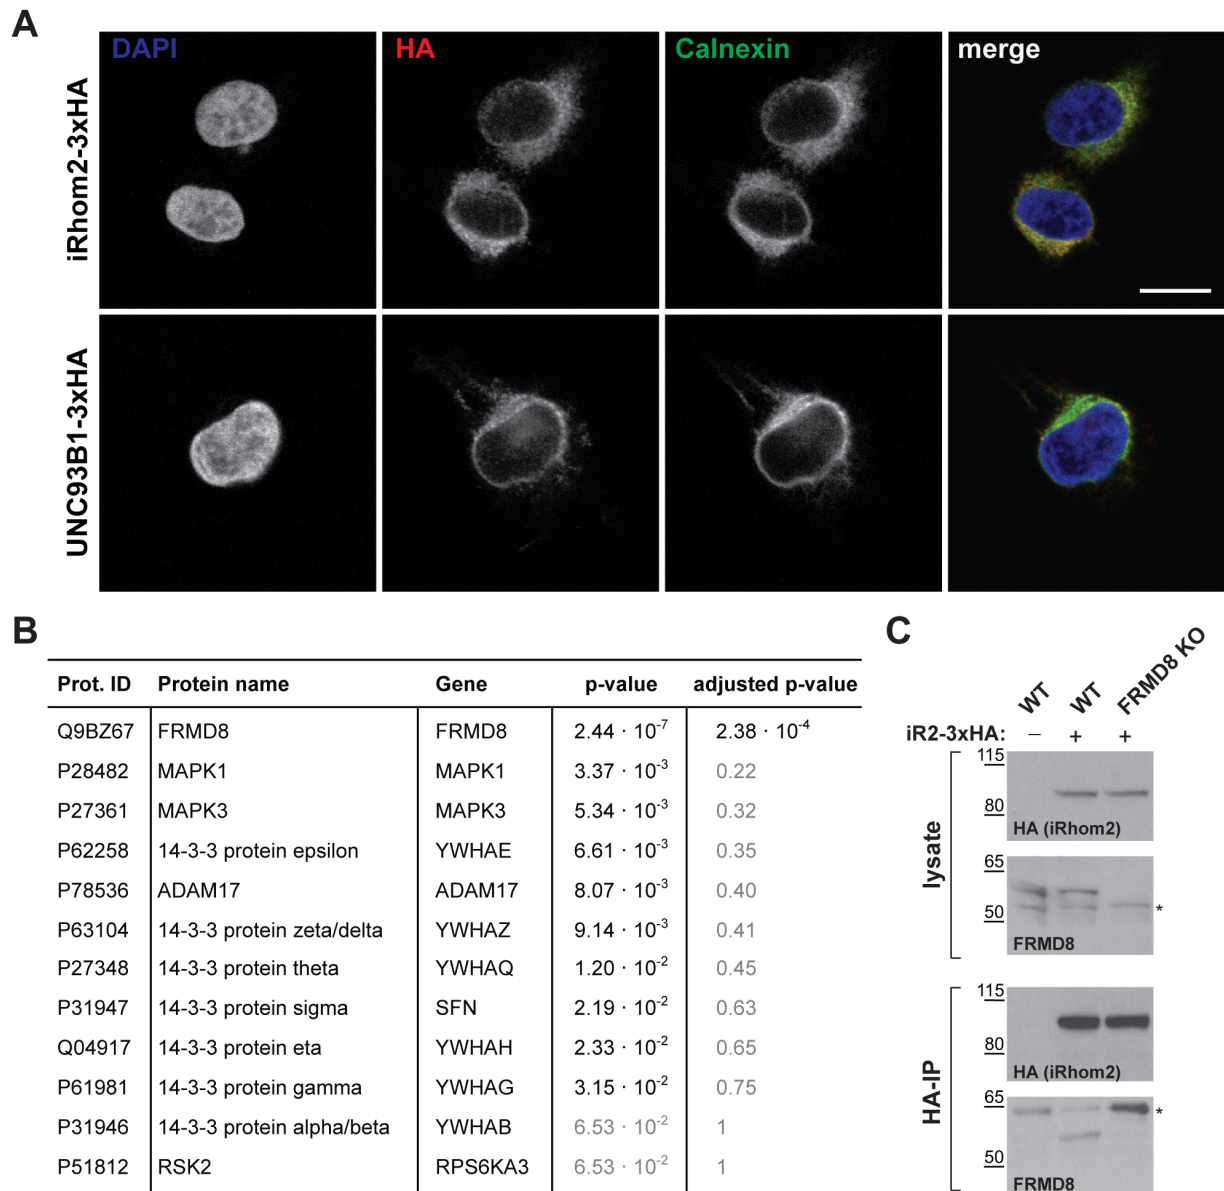

883

884 **Supplementary Fig. 1**

885 **A** HEK293T cells transiently transfected with human iRhom2-3xHA or UNC93B1-3xHA were  
 886 stained with 4',6-diamidino-2-phenylindole (DAPI), blue, to label nuclei, anti-HA to label  
 887 iRhom2-HA (red), and anti-calnexin to label the ER (green). Scale bar: 10  $\mu$ m.

888 **B** List of iRhom2 interaction partners identified in the mass spectrometry screen that have  
 889 either been reported in this study or in previously (Adrain et al., 2012, McIlwain et al., 2012,  
 890 Grieve et al., 2017). P-values from a two-sample t-test in Perseus are listed with p-values >  
 891 0.05 written in grey. P-values were adjusted for multiple hypothesis testing with the  
 892 Benjamini-Hochberg correction and are listed under "adjusted p-values" with p-values > 0.05  
 893 written in grey.

894 **C** Lysates and anti-HA immunoprecipitation (HA-IP) from wild-type (WT) and FRMD8  
 895 knockout (KO) HEK293T cells stably expressing iRhom2-3xHA (indicated) were  
 896 immunoblotted for HA and FRMD8. Nonspecific bands are marked with an asterisk.  
 897  
 898

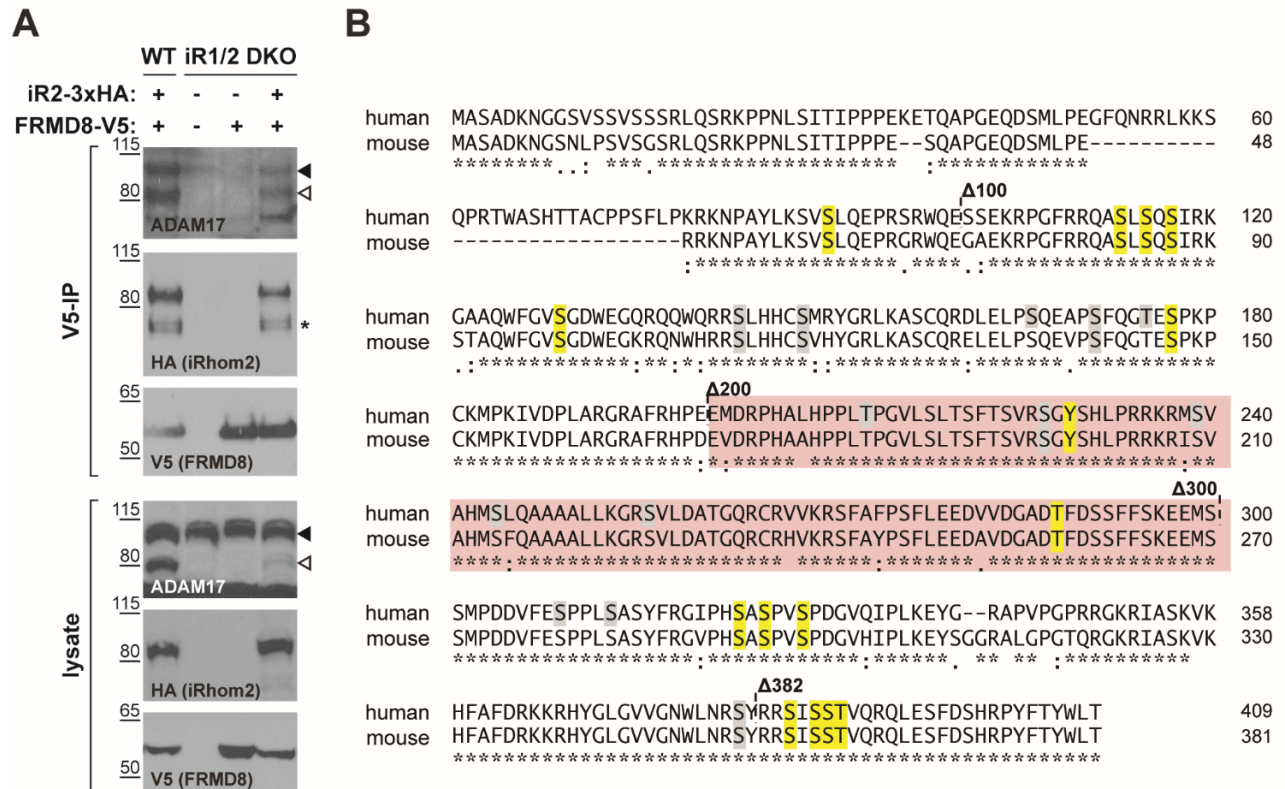

899  
 900 **Supplementary Fig. 2**

901 **A** Lysates and anti-V5 immunoprecipitation (V5-IP) from wild-type (WT) and iRhom1/2  
 902 double-knockout (DKO) HEK293T cells transiently transfected with iRhom2-3xHA and  
 903 FRMD8-V5 (where indicated) were immunoblotted for ADAM17, HA and FRMD8. In this and  
 904 subsequent figures, the pro- and mature form of ADAM17 are indicated with a black and  
 905 white arrowhead, respectively. An asterisk marks a nonspecific band.  
 906 **B** Amino acid sequence alignment of human and mouse iRhom2 N-terminal region using  
 907 Clustal Omega. The region required for FRMD8 binding is highlighted in red. Conserved  
 908 phosphorylation sites that have been mutated to alanine in theiRhom2<sup>pDEAD</sup> (Fig. 3E) are  
 909 marked in yellow. Grey residues indicate additional phosphorylation sites that have been  
 910 reported on PhosphoSitePlus ([www.phosphosite.org](http://www.phosphosite.org)). An asterisk (\*) indicates positions  
 911 which have a fully conserved residue, a colon (: ) indicates strongly similar properties of the  
 912 amino acids, and a period (.) indicates weakly similar properties according to the Clustal  
 913 Omega tool.

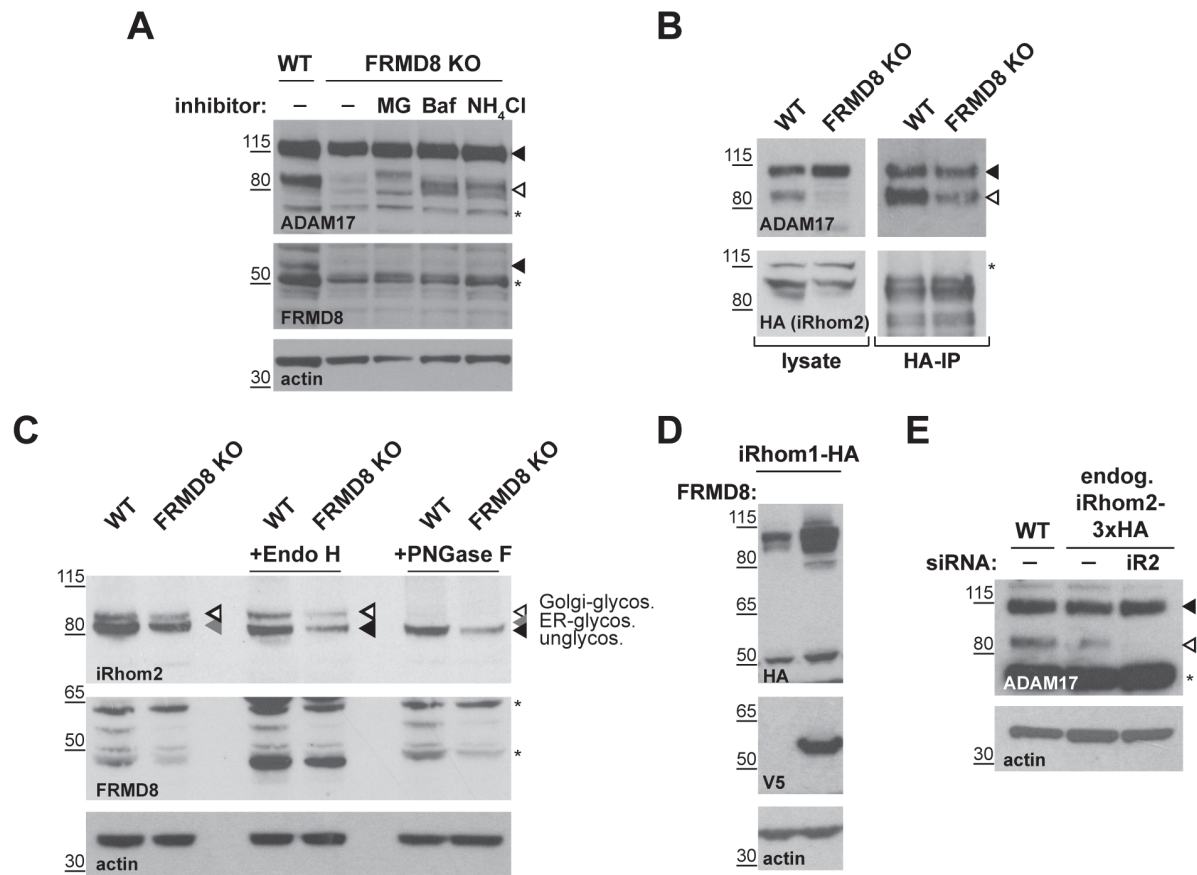

914

915 **Supplementary Fig. 3**

916 **A** Cell lysates of wild-type (WT) and FRMD8 knockout (KO) HEK293T cells treated with 10  
 917  $\mu$ M MG-132 (MG), 200 nM bafilomycin A1 (Baf) or 50 mM ammonium chloride (NH<sub>4</sub>Cl) for 16  
 918 h were immunoblotted for ADAM17, FRMD8, and actin. An asterisk marks a nonspecific  
 919 band.

920 **B** Lysates of WT and FRMD8 KO HEK293T cells stably expressing human iRhom2-3xHA  
 921 were anti-HA immunoprecipitated (HA-IP) and immunoblotted for ADAM17 and HA.  
 922 Nonspecific bands are indicated by an asterisk.

923 **C** N-glycosylation of iRhom2 was analysed using EndoH and PNGase to distinguish ER/*cis*-  
 924 Golgi (EndoH sensitive) and late Golgi localisation (EndoH resistant). Lysates of WT and  
 925 FRMD8 KO HEK293T cells transiently transfected with mouse iRhom2-3xHA were  
 926 deglycosylated with EndoH or PNGase and then immunoblotted for mouse iRhom2, human  
 927 FRMD8 and actin. An asterisk marks a nonspecific band.

928 **D** Lysates of HEK293T cells stably expressing human iRhom1-3xHA and transfected with  
 929 FRMD8-V5 (where indicated) were immunoblotted for HA, V5, and actin.

930 **E** Levels of ADAM17 were analysed in HEK293T-iRhom2-3xHA and HEK293T wild-type  
 931 (WT) cells transfected with siRNAs targeting iRhom2 where indicated. Cell lysates were  
 932 immunoblotted using an anti-ADAM17 or anti-actin antibody. An asterisk marks a nonspecific  
 933 band.

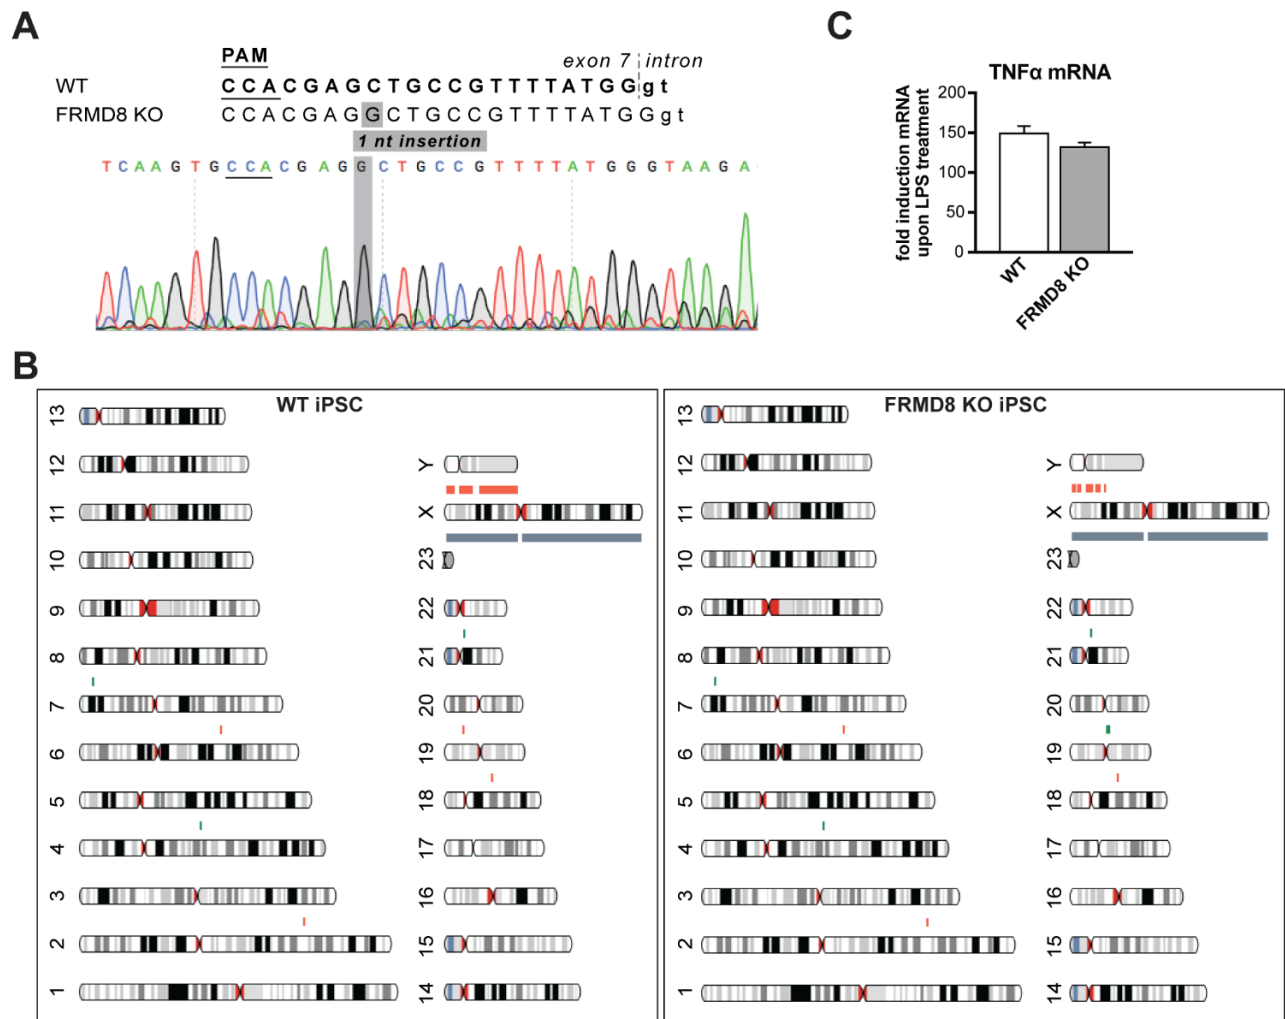

934

935 **Supplementary Fig. 4**

936 **A** Sequencing of the genomic DNA isolated from clonal FRMD8 KO iPSCs shows a 1-nt  
937 insertion. The targeting sequence of the sgRNA is shown in bold (small letters indicate the  
938 sequence within the intronic region) with the protospacer adjacent motif (PAM) sequence  
939 underlined.

940 **B** Parental wild-type (left) and FRMD8 KO (right) iPSC lines were karyotyped by SNP array.  
941 Detected copy number variations are indicated in red (DNA copy number loss in the  
942 indicated region) and green (DNA copy number increase). The AH017-13 iPSC line used  
943 was derived from a female donor therefore the Y chromosome is marked in red (loss of Y  
944 chromosome DNA).

945 **C** TNF $\alpha$  mRNA levels relative to actin mRNA levels were measured by TaqMan PCR in WT  
946 and FRMD8 KO iPSC-derived macrophages without stimulation and after stimulation with  
947 100 ng/ml LPS for 4 h. The fold change of TNF $\alpha$  mRNA between unstimulated and  
948 stimulated cells is shown.

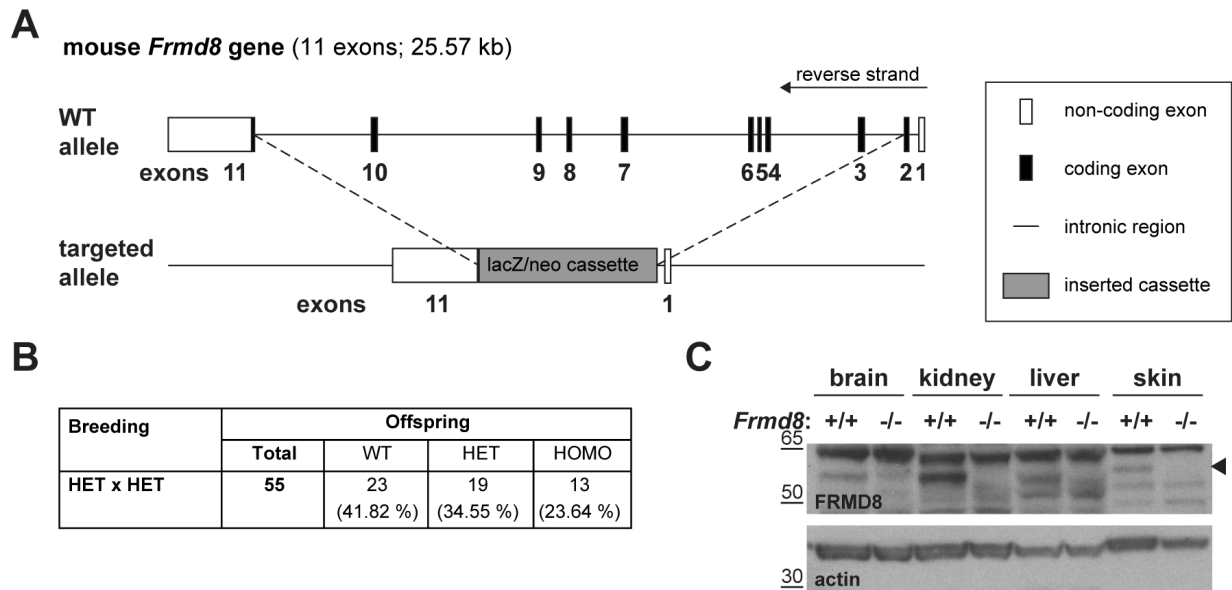

949

950 **Supplementary Fig. 5**

951 **A** Schematic representation of the insertion of a lacZ/neomycin cassette into the *Frmd8* locus  
 952 in the ES cells used to generate *Frmd8*<sup>-/-</sup> mice.

953 **B** Off-spring of *Frmd8*<sup>+/-</sup> x *Frmd8*<sup>+/-</sup> (HET x HET) crosses listed by genotype: *Frmd8*<sup>+/+</sup> (WT),  
 954 *Frmd8*<sup>+/-</sup> (HET), and *Frmd8*<sup>-/-</sup> (KO).

955 **C** Lysates from tissues derived from *Frmd8*<sup>-/-</sup> mice and their wild-type littermate were  
 956 immunoblotted for FRMD8 and actin to confirm the loss of FRMD8 protein (arrowhead) in the  
 957 FRMD8-deficient mice.
